# Supplementary material
Source: PubMed Central journal article supplement (PMC6584276)
Supplement: jamasurg-154-487-s001.pdf [file jamasurg-154-487-s001.pdf]

## Supplementary Online Content

Steffen KJ, King WC, White GE, et al. Change in sexual functioning in women and men in the 5 years after bariatric surgery. *JAMA Surg*. Published online February 20, 2019. doi:10.1001/jamasurg.2018.1162

**eFigure.** Longitudinal Assessment of Bariatric Surgery-2 (LABS-2) Study Flow from Approached Patients to Analysis Sample

**eTable 1.** Items on Sexual Function Questionnaire and Definitions of Meaningful Improvement from Pre-surgery to Post-surgery

**eTable 2.** Sensitivity Analysis of Missing at Random Assumption

**eTable 3.** Mean IWQOL-lite Sexual Life Score by Time Point by Whether that Outcome was Observed or Missing at Each Follow-up Assessment

**eTable 4.** Demographic and Clinical Characteristics of Adults Prior to Bariatric Surgery, by Sex.

**eTable 5.** Baseline Demographic and Clinical Characteristics of Participants Included in and Excluded from Analysis Samples

**eTable 6.** Observed Parameters of Sexual Function Before and After Bariatric Surgery, by Sex

**eTable 7.** Modeled Parameters of Sexual Function Before and After Bariatric Surgery, by Sex

**eTable 8.** Observed Proportion of Patients with Clinically Important Improvements in Parameters of Sexual Function Following Bariatric Surgery, by Sex

**eTable 9.** Associations between Baseline Characteristics and Surgical Procedure with Clinically Meaningful Presurgery-to-Postsurgery Improvements in Parameters of Sexual Function in Years

1-5 Following Bariatric Surgery in Women.<sup>a</sup>

**eTable 10.** Associations between Baseline Characteristics and Surgical Procedure with Clinically Meaningful Presurgery-to-Postsurgery Improvements in Parameters of Sexual Function in Years

1-5 Following Bariatric Surgery in Men.<sup>a</sup>

**eFigure.** Longitudinal Assessment of Bariatric Surgery-2 (LABS-2) Study Flow from Approached Patients to Analysis Sample

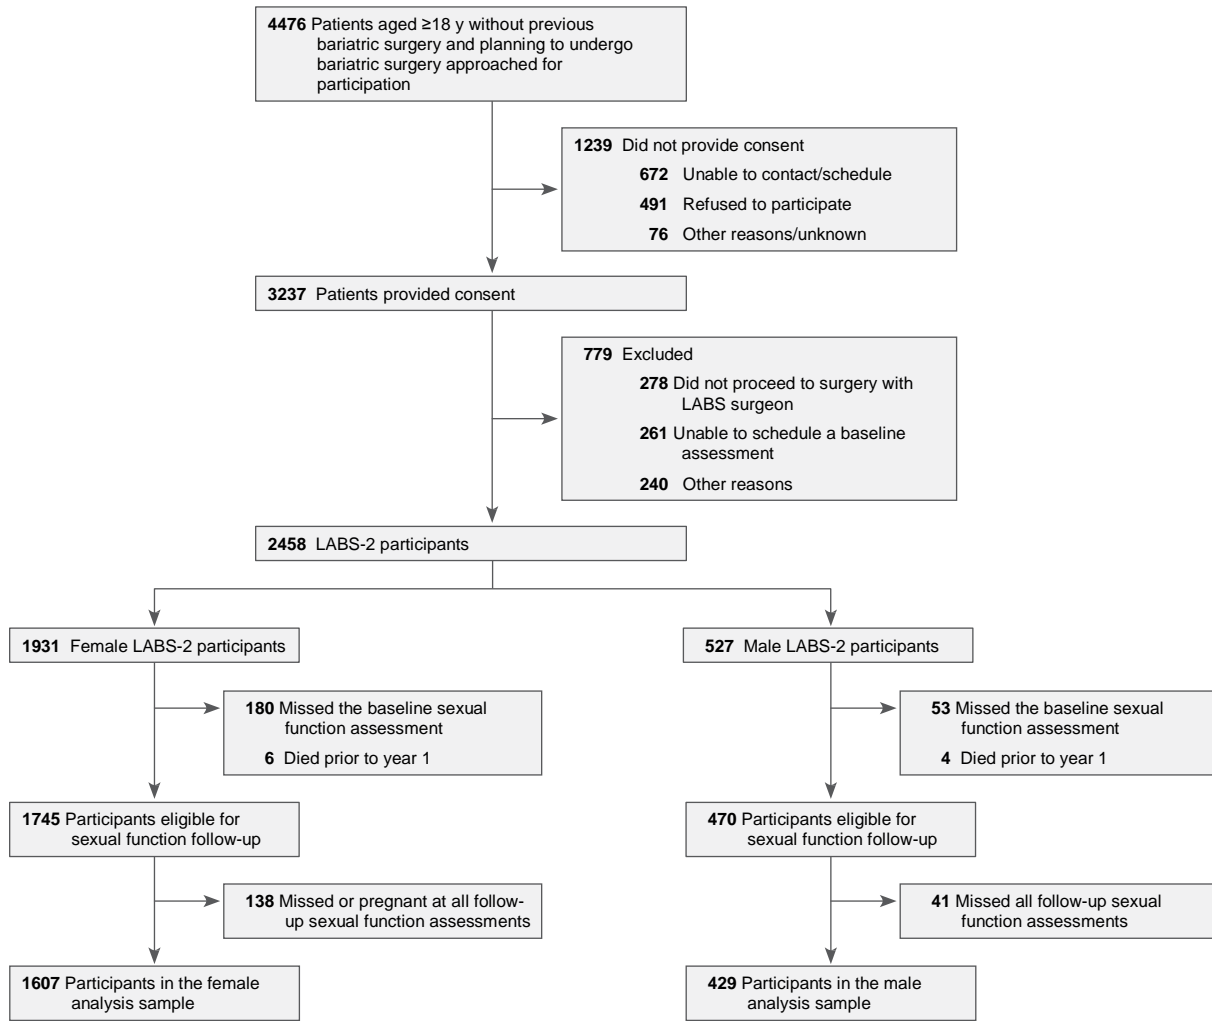

**eTable 1.** Items on Sexual Function Questionnaire and Definitions of Clinically Meaningful Pre-surgery to Post-surgery Improvement

| Domain                                     | Question                                                                                                                                                                         | Original Response Options and Recoded Responses                                                                                                                                                                                                                                                                                                                                                                                                                                                           |          | Improvement from Pre-surgery to Post-surgery |                  | Additional Related Questions |                        |                                            |                           |                     |                      |                                                                                                                                                                                                                                                                                                                                                                                                                                                         |                     |                              |                               |                                                      |                                                                                                                                                                                                                                                                                                                                         |                                                      |                                            |                                  |                                                                                                                  |                |                                                                                             |                                                                                                                                                                           |                              |                                                                                                           |                                                                                                                 |
|--------------------------------------------|----------------------------------------------------------------------------------------------------------------------------------------------------------------------------------|-----------------------------------------------------------------------------------------------------------------------------------------------------------------------------------------------------------------------------------------------------------------------------------------------------------------------------------------------------------------------------------------------------------------------------------------------------------------------------------------------------------|----------|----------------------------------------------|------------------|------------------------------|------------------------|--------------------------------------------|---------------------------|---------------------|----------------------|---------------------------------------------------------------------------------------------------------------------------------------------------------------------------------------------------------------------------------------------------------------------------------------------------------------------------------------------------------------------------------------------------------------------------------------------------------|---------------------|------------------------------|-------------------------------|------------------------------------------------------|-----------------------------------------------------------------------------------------------------------------------------------------------------------------------------------------------------------------------------------------------------------------------------------------------------------------------------------------|------------------------------------------------------|--------------------------------------------|----------------------------------|------------------------------------------------------------------------------------------------------------------|----------------|---------------------------------------------------------------------------------------------|---------------------------------------------------------------------------------------------------------------------------------------------------------------------------|------------------------------|-----------------------------------------------------------------------------------------------------------|-----------------------------------------------------------------------------------------------------------------|
| <b>Desire</b>                              | During the past month, how often have you felt sexual desire or interest, that is desire or interest to engage in any activity that is arousing to you, alone or with a partner? | <table border="1"> <thead> <tr> <th>Original</th> <th>Recoded</th> </tr> </thead> <tbody> <tr> <td>'Not at all'</td> <td>'Not at all'</td> </tr> <tr> <td>'Once a month'</td> <td>'Once a month'</td> </tr> <tr> <td>'Once a week'</td> <td>'Once a week'</td> </tr> <tr> <td>'A few times a week'</td> <td>'A few times a week'</td> </tr> <tr> <td><b>'Once a day'</b></td> <td rowspan="2"><b>'At least once a day'</b></td> </tr> <tr> <td><b>'More than once a day'</b></td> </tr> </tbody> </table> | Original | Recoded                                      | 'Not at all'     | 'Not at all'                 | 'Once a month'         | 'Once a month'                             | 'Once a week'             | 'Once a week'       | 'A few times a week' | 'A few times a week'                                                                                                                                                                                                                                                                                                                                                                                                                                    | <b>'Once a day'</b> | <b>'At least once a day'</b> | <b>'More than once a day'</b> |                                                      | <table border="1"> <thead> <tr> <th>Baseline</th> <th>Improvement at Follow-Up</th> </tr> </thead> <tbody> <tr> <td>'Not at all'</td> <td>'Once a month' or more</td> </tr> <tr> <td>'Once a month'</td> <td>'Once a week' or more</td> </tr> <tr> <td>'Once a week'</td> <td>'A few times a week' or more</td> </tr> </tbody> </table> | Baseline                                             | Improvement at Follow-Up                   | 'Not at all'                     | 'Once a month' or more                                                                                           | 'Once a month' | 'Once a week' or more                                                                       | 'Once a week'                                                                                                                                                             | 'A few times a week' or more | <p><i>Those reporting 'at least a few times a week' at baseline were excluded from this analysis.</i></p> |                                                                                                                 |
| Original                                   | Recoded                                                                                                                                                                          |                                                                                                                                                                                                                                                                                                                                                                                                                                                                                                           |          |                                              |                  |                              |                        |                                            |                           |                     |                      |                                                                                                                                                                                                                                                                                                                                                                                                                                                         |                     |                              |                               |                                                      |                                                                                                                                                                                                                                                                                                                                         |                                                      |                                            |                                  |                                                                                                                  |                |                                                                                             |                                                                                                                                                                           |                              |                                                                                                           |                                                                                                                 |
| 'Not at all'                               | 'Not at all'                                                                                                                                                                     |                                                                                                                                                                                                                                                                                                                                                                                                                                                                                                           |          |                                              |                  |                              |                        |                                            |                           |                     |                      |                                                                                                                                                                                                                                                                                                                                                                                                                                                         |                     |                              |                               |                                                      |                                                                                                                                                                                                                                                                                                                                         |                                                      |                                            |                                  |                                                                                                                  |                |                                                                                             |                                                                                                                                                                           |                              |                                                                                                           |                                                                                                                 |
| 'Once a month'                             | 'Once a month'                                                                                                                                                                   |                                                                                                                                                                                                                                                                                                                                                                                                                                                                                                           |          |                                              |                  |                              |                        |                                            |                           |                     |                      |                                                                                                                                                                                                                                                                                                                                                                                                                                                         |                     |                              |                               |                                                      |                                                                                                                                                                                                                                                                                                                                         |                                                      |                                            |                                  |                                                                                                                  |                |                                                                                             |                                                                                                                                                                           |                              |                                                                                                           |                                                                                                                 |
| 'Once a week'                              | 'Once a week'                                                                                                                                                                    |                                                                                                                                                                                                                                                                                                                                                                                                                                                                                                           |          |                                              |                  |                              |                        |                                            |                           |                     |                      |                                                                                                                                                                                                                                                                                                                                                                                                                                                         |                     |                              |                               |                                                      |                                                                                                                                                                                                                                                                                                                                         |                                                      |                                            |                                  |                                                                                                                  |                |                                                                                             |                                                                                                                                                                           |                              |                                                                                                           |                                                                                                                 |
| 'A few times a week'                       | 'A few times a week'                                                                                                                                                             |                                                                                                                                                                                                                                                                                                                                                                                                                                                                                                           |          |                                              |                  |                              |                        |                                            |                           |                     |                      |                                                                                                                                                                                                                                                                                                                                                                                                                                                         |                     |                              |                               |                                                      |                                                                                                                                                                                                                                                                                                                                         |                                                      |                                            |                                  |                                                                                                                  |                |                                                                                             |                                                                                                                                                                           |                              |                                                                                                           |                                                                                                                 |
| <b>'Once a day'</b>                        | <b>'At least once a day'</b>                                                                                                                                                     |                                                                                                                                                                                                                                                                                                                                                                                                                                                                                                           |          |                                              |                  |                              |                        |                                            |                           |                     |                      |                                                                                                                                                                                                                                                                                                                                                                                                                                                         |                     |                              |                               |                                                      |                                                                                                                                                                                                                                                                                                                                         |                                                      |                                            |                                  |                                                                                                                  |                |                                                                                             |                                                                                                                                                                           |                              |                                                                                                           |                                                                                                                 |
| <b>'More than once a day'</b>              |                                                                                                                                                                                  |                                                                                                                                                                                                                                                                                                                                                                                                                                                                                                           |          |                                              |                  |                              |                        |                                            |                           |                     |                      |                                                                                                                                                                                                                                                                                                                                                                                                                                                         |                     |                              |                               |                                                      |                                                                                                                                                                                                                                                                                                                                         |                                                      |                                            |                                  |                                                                                                                  |                |                                                                                             |                                                                                                                                                                           |                              |                                                                                                           |                                                                                                                 |
| Baseline                                   | Improvement at Follow-Up                                                                                                                                                         |                                                                                                                                                                                                                                                                                                                                                                                                                                                                                                           |          |                                              |                  |                              |                        |                                            |                           |                     |                      |                                                                                                                                                                                                                                                                                                                                                                                                                                                         |                     |                              |                               |                                                      |                                                                                                                                                                                                                                                                                                                                         |                                                      |                                            |                                  |                                                                                                                  |                |                                                                                             |                                                                                                                                                                           |                              |                                                                                                           |                                                                                                                 |
| 'Not at all'                               | 'Once a month' or more                                                                                                                                                           |                                                                                                                                                                                                                                                                                                                                                                                                                                                                                                           |          |                                              |                  |                              |                        |                                            |                           |                     |                      |                                                                                                                                                                                                                                                                                                                                                                                                                                                         |                     |                              |                               |                                                      |                                                                                                                                                                                                                                                                                                                                         |                                                      |                                            |                                  |                                                                                                                  |                |                                                                                             |                                                                                                                                                                           |                              |                                                                                                           |                                                                                                                 |
| 'Once a month'                             | 'Once a week' or more                                                                                                                                                            |                                                                                                                                                                                                                                                                                                                                                                                                                                                                                                           |          |                                              |                  |                              |                        |                                            |                           |                     |                      |                                                                                                                                                                                                                                                                                                                                                                                                                                                         |                     |                              |                               |                                                      |                                                                                                                                                                                                                                                                                                                                         |                                                      |                                            |                                  |                                                                                                                  |                |                                                                                             |                                                                                                                                                                           |                              |                                                                                                           |                                                                                                                 |
| 'Once a week'                              | 'A few times a week' or more                                                                                                                                                     |                                                                                                                                                                                                                                                                                                                                                                                                                                                                                                           |          |                                              |                  |                              |                        |                                            |                           |                     |                      |                                                                                                                                                                                                                                                                                                                                                                                                                                                         |                     |                              |                               |                                                      |                                                                                                                                                                                                                                                                                                                                         |                                                      |                                            |                                  |                                                                                                                  |                |                                                                                             |                                                                                                                                                                           |                              |                                                                                                           |                                                                                                                 |
| <b>Frequency</b>                           | During the past month, how often have you participated in any sexual activity, that is any activity that is arousing to you, alone or with a partner?                            | <table border="1"> <thead> <tr> <th>Original</th> <th>Recoded</th> </tr> </thead> <tbody> <tr> <td>'Not at all'</td> <td>'Not at all'</td> </tr> <tr> <td>'Once a month'</td> <td>'Once a month'</td> </tr> <tr> <td>'Once a week'</td> <td>'Once a week'</td> </tr> <tr> <td>'A few times a week'</td> <td>'A few times a week'</td> </tr> <tr> <td><b>'Once a day'</b></td> <td rowspan="2"><b>'At least once a day'</b></td> </tr> <tr> <td><b>'More than once a day'</b></td> </tr> </tbody> </table> | Original | Recoded                                      | 'Not at all'     | 'Not at all'                 | 'Once a month'         | 'Once a month'                             | 'Once a week'             | 'Once a week'       | 'A few times a week' | 'A few times a week'                                                                                                                                                                                                                                                                                                                                                                                                                                    | <b>'Once a day'</b> | <b>'At least once a day'</b> | <b>'More than once a day'</b> |                                                      | <table border="1"> <thead> <tr> <th>Baseline</th> <th>Improvement at Follow-Up</th> </tr> </thead> <tbody> <tr> <td>'Not at all'</td> <td>'Once a month' or more</td> </tr> <tr> <td>'Once a month'</td> <td>'Once a week' or more</td> </tr> <tr> <td>'Once a week'</td> <td>'A few times a week' or more</td> </tr> </tbody> </table> | Baseline                                             | Improvement at Follow-Up                   | 'Not at all'                     | 'Once a month' or more                                                                                           | 'Once a month' | 'Once a week' or more                                                                       | 'Once a week'                                                                                                                                                             | 'A few times a week' or more | <p><i>Those reporting 'at least a few times a week' at baseline were excluded from this analysis.</i></p> | If applicable, participants selected reasons for no sexual activity (e.g., no partner, partner not interested). |
| Original                                   | Recoded                                                                                                                                                                          |                                                                                                                                                                                                                                                                                                                                                                                                                                                                                                           |          |                                              |                  |                              |                        |                                            |                           |                     |                      |                                                                                                                                                                                                                                                                                                                                                                                                                                                         |                     |                              |                               |                                                      |                                                                                                                                                                                                                                                                                                                                         |                                                      |                                            |                                  |                                                                                                                  |                |                                                                                             |                                                                                                                                                                           |                              |                                                                                                           |                                                                                                                 |
| 'Not at all'                               | 'Not at all'                                                                                                                                                                     |                                                                                                                                                                                                                                                                                                                                                                                                                                                                                                           |          |                                              |                  |                              |                        |                                            |                           |                     |                      |                                                                                                                                                                                                                                                                                                                                                                                                                                                         |                     |                              |                               |                                                      |                                                                                                                                                                                                                                                                                                                                         |                                                      |                                            |                                  |                                                                                                                  |                |                                                                                             |                                                                                                                                                                           |                              |                                                                                                           |                                                                                                                 |
| 'Once a month'                             | 'Once a month'                                                                                                                                                                   |                                                                                                                                                                                                                                                                                                                                                                                                                                                                                                           |          |                                              |                  |                              |                        |                                            |                           |                     |                      |                                                                                                                                                                                                                                                                                                                                                                                                                                                         |                     |                              |                               |                                                      |                                                                                                                                                                                                                                                                                                                                         |                                                      |                                            |                                  |                                                                                                                  |                |                                                                                             |                                                                                                                                                                           |                              |                                                                                                           |                                                                                                                 |
| 'Once a week'                              | 'Once a week'                                                                                                                                                                    |                                                                                                                                                                                                                                                                                                                                                                                                                                                                                                           |          |                                              |                  |                              |                        |                                            |                           |                     |                      |                                                                                                                                                                                                                                                                                                                                                                                                                                                         |                     |                              |                               |                                                      |                                                                                                                                                                                                                                                                                                                                         |                                                      |                                            |                                  |                                                                                                                  |                |                                                                                             |                                                                                                                                                                           |                              |                                                                                                           |                                                                                                                 |
| 'A few times a week'                       | 'A few times a week'                                                                                                                                                             |                                                                                                                                                                                                                                                                                                                                                                                                                                                                                                           |          |                                              |                  |                              |                        |                                            |                           |                     |                      |                                                                                                                                                                                                                                                                                                                                                                                                                                                         |                     |                              |                               |                                                      |                                                                                                                                                                                                                                                                                                                                         |                                                      |                                            |                                  |                                                                                                                  |                |                                                                                             |                                                                                                                                                                           |                              |                                                                                                           |                                                                                                                 |
| <b>'Once a day'</b>                        | <b>'At least once a day'</b>                                                                                                                                                     |                                                                                                                                                                                                                                                                                                                                                                                                                                                                                                           |          |                                              |                  |                              |                        |                                            |                           |                     |                      |                                                                                                                                                                                                                                                                                                                                                                                                                                                         |                     |                              |                               |                                                      |                                                                                                                                                                                                                                                                                                                                         |                                                      |                                            |                                  |                                                                                                                  |                |                                                                                             |                                                                                                                                                                           |                              |                                                                                                           |                                                                                                                 |
| <b>'More than once a day'</b>              |                                                                                                                                                                                  |                                                                                                                                                                                                                                                                                                                                                                                                                                                                                                           |          |                                              |                  |                              |                        |                                            |                           |                     |                      |                                                                                                                                                                                                                                                                                                                                                                                                                                                         |                     |                              |                               |                                                      |                                                                                                                                                                                                                                                                                                                                         |                                                      |                                            |                                  |                                                                                                                  |                |                                                                                             |                                                                                                                                                                           |                              |                                                                                                           |                                                                                                                 |
| Baseline                                   | Improvement at Follow-Up                                                                                                                                                         |                                                                                                                                                                                                                                                                                                                                                                                                                                                                                                           |          |                                              |                  |                              |                        |                                            |                           |                     |                      |                                                                                                                                                                                                                                                                                                                                                                                                                                                         |                     |                              |                               |                                                      |                                                                                                                                                                                                                                                                                                                                         |                                                      |                                            |                                  |                                                                                                                  |                |                                                                                             |                                                                                                                                                                           |                              |                                                                                                           |                                                                                                                 |
| 'Not at all'                               | 'Once a month' or more                                                                                                                                                           |                                                                                                                                                                                                                                                                                                                                                                                                                                                                                                           |          |                                              |                  |                              |                        |                                            |                           |                     |                      |                                                                                                                                                                                                                                                                                                                                                                                                                                                         |                     |                              |                               |                                                      |                                                                                                                                                                                                                                                                                                                                         |                                                      |                                            |                                  |                                                                                                                  |                |                                                                                             |                                                                                                                                                                           |                              |                                                                                                           |                                                                                                                 |
| 'Once a month'                             | 'Once a week' or more                                                                                                                                                            |                                                                                                                                                                                                                                                                                                                                                                                                                                                                                                           |          |                                              |                  |                              |                        |                                            |                           |                     |                      |                                                                                                                                                                                                                                                                                                                                                                                                                                                         |                     |                              |                               |                                                      |                                                                                                                                                                                                                                                                                                                                         |                                                      |                                            |                                  |                                                                                                                  |                |                                                                                             |                                                                                                                                                                           |                              |                                                                                                           |                                                                                                                 |
| 'Once a week'                              | 'A few times a week' or more                                                                                                                                                     |                                                                                                                                                                                                                                                                                                                                                                                                                                                                                                           |          |                                              |                  |                              |                        |                                            |                           |                     |                      |                                                                                                                                                                                                                                                                                                                                                                                                                                                         |                     |                              |                               |                                                      |                                                                                                                                                                                                                                                                                                                                         |                                                      |                                            |                                  |                                                                                                                  |                |                                                                                             |                                                                                                                                                                           |                              |                                                                                                           |                                                                                                                 |
| <b>Physical Health Limitations</b>         | During the past month, how much has your physical health limited your sexual activity, that is any activity that is arousing to you, alone or with a partner?                    | <table border="1"> <thead> <tr> <th>Original</th> <th>Recoded</th> </tr> </thead> <tbody> <tr> <td>'Not at all'</td> <td rowspan="5">N/A</td> </tr> <tr> <td>'Slightly'</td> </tr> <tr> <td>'Moderately'</td> </tr> <tr> <td>'Quite a bit'</td> </tr> <tr> <td>'Extremely'</td> </tr> </tbody> </table>                                                                                                                                                                                                   | Original | Recoded                                      | 'Not at all'     | N/A                          | 'Slightly'             | 'Moderately'                               | 'Quite a bit'             | 'Extremely'         |                      | <table border="1"> <thead> <tr> <th>Baseline</th> <th>Improvement at Follow-Up</th> </tr> </thead> <tbody> <tr> <td>'Extremely'</td> <td>'Moderately' or better</td> </tr> <tr> <td>'Quite a bit'</td> <td>'Moderately' or better</td> </tr> <tr> <td>'Moderately'</td> <td>'Not at all'</td> </tr> <tr> <td>'Slightly'</td> <td>'Not at all'</td> </tr> </tbody> </table>                                                                              | Baseline            | Improvement at Follow-Up     | 'Extremely'                   | 'Moderately' or better                               | 'Quite a bit'                                                                                                                                                                                                                                                                                                                           | 'Moderately' or better                               | 'Moderately'                               | 'Not at all'                     | 'Slightly'                                                                                                       | 'Not at all'   | <p><i>Those who reported 'not at all' at baseline were excluded from this analysis.</i></p> | If applicable, participants selected ways in which physical health limited sexual activity (e.g., pain/discomfort, difficulty having an orgasm, fear of hurting partner). |                              |                                                                                                           |                                                                                                                 |
| Original                                   | Recoded                                                                                                                                                                          |                                                                                                                                                                                                                                                                                                                                                                                                                                                                                                           |          |                                              |                  |                              |                        |                                            |                           |                     |                      |                                                                                                                                                                                                                                                                                                                                                                                                                                                         |                     |                              |                               |                                                      |                                                                                                                                                                                                                                                                                                                                         |                                                      |                                            |                                  |                                                                                                                  |                |                                                                                             |                                                                                                                                                                           |                              |                                                                                                           |                                                                                                                 |
| 'Not at all'                               | N/A                                                                                                                                                                              |                                                                                                                                                                                                                                                                                                                                                                                                                                                                                                           |          |                                              |                  |                              |                        |                                            |                           |                     |                      |                                                                                                                                                                                                                                                                                                                                                                                                                                                         |                     |                              |                               |                                                      |                                                                                                                                                                                                                                                                                                                                         |                                                      |                                            |                                  |                                                                                                                  |                |                                                                                             |                                                                                                                                                                           |                              |                                                                                                           |                                                                                                                 |
| 'Slightly'                                 |                                                                                                                                                                                  |                                                                                                                                                                                                                                                                                                                                                                                                                                                                                                           |          |                                              |                  |                              |                        |                                            |                           |                     |                      |                                                                                                                                                                                                                                                                                                                                                                                                                                                         |                     |                              |                               |                                                      |                                                                                                                                                                                                                                                                                                                                         |                                                      |                                            |                                  |                                                                                                                  |                |                                                                                             |                                                                                                                                                                           |                              |                                                                                                           |                                                                                                                 |
| 'Moderately'                               |                                                                                                                                                                                  |                                                                                                                                                                                                                                                                                                                                                                                                                                                                                                           |          |                                              |                  |                              |                        |                                            |                           |                     |                      |                                                                                                                                                                                                                                                                                                                                                                                                                                                         |                     |                              |                               |                                                      |                                                                                                                                                                                                                                                                                                                                         |                                                      |                                            |                                  |                                                                                                                  |                |                                                                                             |                                                                                                                                                                           |                              |                                                                                                           |                                                                                                                 |
| 'Quite a bit'                              |                                                                                                                                                                                  |                                                                                                                                                                                                                                                                                                                                                                                                                                                                                                           |          |                                              |                  |                              |                        |                                            |                           |                     |                      |                                                                                                                                                                                                                                                                                                                                                                                                                                                         |                     |                              |                               |                                                      |                                                                                                                                                                                                                                                                                                                                         |                                                      |                                            |                                  |                                                                                                                  |                |                                                                                             |                                                                                                                                                                           |                              |                                                                                                           |                                                                                                                 |
| 'Extremely'                                |                                                                                                                                                                                  |                                                                                                                                                                                                                                                                                                                                                                                                                                                                                                           |          |                                              |                  |                              |                        |                                            |                           |                     |                      |                                                                                                                                                                                                                                                                                                                                                                                                                                                         |                     |                              |                               |                                                      |                                                                                                                                                                                                                                                                                                                                         |                                                      |                                            |                                  |                                                                                                                  |                |                                                                                             |                                                                                                                                                                           |                              |                                                                                                           |                                                                                                                 |
| Baseline                                   | Improvement at Follow-Up                                                                                                                                                         |                                                                                                                                                                                                                                                                                                                                                                                                                                                                                                           |          |                                              |                  |                              |                        |                                            |                           |                     |                      |                                                                                                                                                                                                                                                                                                                                                                                                                                                         |                     |                              |                               |                                                      |                                                                                                                                                                                                                                                                                                                                         |                                                      |                                            |                                  |                                                                                                                  |                |                                                                                             |                                                                                                                                                                           |                              |                                                                                                           |                                                                                                                 |
| 'Extremely'                                | 'Moderately' or better                                                                                                                                                           |                                                                                                                                                                                                                                                                                                                                                                                                                                                                                                           |          |                                              |                  |                              |                        |                                            |                           |                     |                      |                                                                                                                                                                                                                                                                                                                                                                                                                                                         |                     |                              |                               |                                                      |                                                                                                                                                                                                                                                                                                                                         |                                                      |                                            |                                  |                                                                                                                  |                |                                                                                             |                                                                                                                                                                           |                              |                                                                                                           |                                                                                                                 |
| 'Quite a bit'                              | 'Moderately' or better                                                                                                                                                           |                                                                                                                                                                                                                                                                                                                                                                                                                                                                                                           |          |                                              |                  |                              |                        |                                            |                           |                     |                      |                                                                                                                                                                                                                                                                                                                                                                                                                                                         |                     |                              |                               |                                                      |                                                                                                                                                                                                                                                                                                                                         |                                                      |                                            |                                  |                                                                                                                  |                |                                                                                             |                                                                                                                                                                           |                              |                                                                                                           |                                                                                                                 |
| 'Moderately'                               | 'Not at all'                                                                                                                                                                     |                                                                                                                                                                                                                                                                                                                                                                                                                                                                                                           |          |                                              |                  |                              |                        |                                            |                           |                     |                      |                                                                                                                                                                                                                                                                                                                                                                                                                                                         |                     |                              |                               |                                                      |                                                                                                                                                                                                                                                                                                                                         |                                                      |                                            |                                  |                                                                                                                  |                |                                                                                             |                                                                                                                                                                           |                              |                                                                                                           |                                                                                                                 |
| 'Slightly'                                 | 'Not at all'                                                                                                                                                                     |                                                                                                                                                                                                                                                                                                                                                                                                                                                                                                           |          |                                              |                  |                              |                        |                                            |                           |                     |                      |                                                                                                                                                                                                                                                                                                                                                                                                                                                         |                     |                              |                               |                                                      |                                                                                                                                                                                                                                                                                                                                         |                                                      |                                            |                                  |                                                                                                                  |                |                                                                                             |                                                                                                                                                                           |                              |                                                                                                           |                                                                                                                 |
| <b>Satisfaction</b>                        | Over the past month, how satisfied have you been with your overall sexual life?                                                                                                  | <table border="1"> <thead> <tr> <th>Original</th> <th>Recoded</th> </tr> </thead> <tbody> <tr> <td>'Very satisfied'</td> <td rowspan="5">N/A</td> </tr> <tr> <td>'Moderately satisfied'</td> </tr> <tr> <td>'About equally satisfied and dissatisfied'</td> </tr> <tr> <td>'Moderately dissatisfied'</td> </tr> <tr> <td>'Very dissatisfied'</td> </tr> </tbody> </table>                                                                                                                                 | Original | Recoded                                      | 'Very satisfied' | N/A                          | 'Moderately satisfied' | 'About equally satisfied and dissatisfied' | 'Moderately dissatisfied' | 'Very dissatisfied' |                      | <table border="1"> <thead> <tr> <th>Baseline</th> <th>Improvement at Follow-Up</th> </tr> </thead> <tbody> <tr> <td>'Very dissatisfied'</td> <td>'About equally satisfied and dissatisfied' or better</td> </tr> <tr> <td>'Moderately dissatisfied'</td> <td>'About equally satisfied and dissatisfied' or better</td> </tr> <tr> <td>'About equally satisfied and dissatisfied'</td> <td>'Moderately satisfied' or better</td> </tr> </tbody> </table> | Baseline            | Improvement at Follow-Up     | 'Very dissatisfied'           | 'About equally satisfied and dissatisfied' or better | 'Moderately dissatisfied'                                                                                                                                                                                                                                                                                                               | 'About equally satisfied and dissatisfied' or better | 'About equally satisfied and dissatisfied' | 'Moderately satisfied' or better | <p><i>Those who were 'very satisfied' or 'moderately satisfied' at baseline were excluded from analysis.</i></p> |                |                                                                                             |                                                                                                                                                                           |                              |                                                                                                           |                                                                                                                 |
| Original                                   | Recoded                                                                                                                                                                          |                                                                                                                                                                                                                                                                                                                                                                                                                                                                                                           |          |                                              |                  |                              |                        |                                            |                           |                     |                      |                                                                                                                                                                                                                                                                                                                                                                                                                                                         |                     |                              |                               |                                                      |                                                                                                                                                                                                                                                                                                                                         |                                                      |                                            |                                  |                                                                                                                  |                |                                                                                             |                                                                                                                                                                           |                              |                                                                                                           |                                                                                                                 |
| 'Very satisfied'                           | N/A                                                                                                                                                                              |                                                                                                                                                                                                                                                                                                                                                                                                                                                                                                           |          |                                              |                  |                              |                        |                                            |                           |                     |                      |                                                                                                                                                                                                                                                                                                                                                                                                                                                         |                     |                              |                               |                                                      |                                                                                                                                                                                                                                                                                                                                         |                                                      |                                            |                                  |                                                                                                                  |                |                                                                                             |                                                                                                                                                                           |                              |                                                                                                           |                                                                                                                 |
| 'Moderately satisfied'                     |                                                                                                                                                                                  |                                                                                                                                                                                                                                                                                                                                                                                                                                                                                                           |          |                                              |                  |                              |                        |                                            |                           |                     |                      |                                                                                                                                                                                                                                                                                                                                                                                                                                                         |                     |                              |                               |                                                      |                                                                                                                                                                                                                                                                                                                                         |                                                      |                                            |                                  |                                                                                                                  |                |                                                                                             |                                                                                                                                                                           |                              |                                                                                                           |                                                                                                                 |
| 'About equally satisfied and dissatisfied' |                                                                                                                                                                                  |                                                                                                                                                                                                                                                                                                                                                                                                                                                                                                           |          |                                              |                  |                              |                        |                                            |                           |                     |                      |                                                                                                                                                                                                                                                                                                                                                                                                                                                         |                     |                              |                               |                                                      |                                                                                                                                                                                                                                                                                                                                         |                                                      |                                            |                                  |                                                                                                                  |                |                                                                                             |                                                                                                                                                                           |                              |                                                                                                           |                                                                                                                 |
| 'Moderately dissatisfied'                  |                                                                                                                                                                                  |                                                                                                                                                                                                                                                                                                                                                                                                                                                                                                           |          |                                              |                  |                              |                        |                                            |                           |                     |                      |                                                                                                                                                                                                                                                                                                                                                                                                                                                         |                     |                              |                               |                                                      |                                                                                                                                                                                                                                                                                                                                         |                                                      |                                            |                                  |                                                                                                                  |                |                                                                                             |                                                                                                                                                                           |                              |                                                                                                           |                                                                                                                 |
| 'Very dissatisfied'                        |                                                                                                                                                                                  |                                                                                                                                                                                                                                                                                                                                                                                                                                                                                                           |          |                                              |                  |                              |                        |                                            |                           |                     |                      |                                                                                                                                                                                                                                                                                                                                                                                                                                                         |                     |                              |                               |                                                      |                                                                                                                                                                                                                                                                                                                                         |                                                      |                                            |                                  |                                                                                                                  |                |                                                                                             |                                                                                                                                                                           |                              |                                                                                                           |                                                                                                                 |
| Baseline                                   | Improvement at Follow-Up                                                                                                                                                         |                                                                                                                                                                                                                                                                                                                                                                                                                                                                                                           |          |                                              |                  |                              |                        |                                            |                           |                     |                      |                                                                                                                                                                                                                                                                                                                                                                                                                                                         |                     |                              |                               |                                                      |                                                                                                                                                                                                                                                                                                                                         |                                                      |                                            |                                  |                                                                                                                  |                |                                                                                             |                                                                                                                                                                           |                              |                                                                                                           |                                                                                                                 |
| 'Very dissatisfied'                        | 'About equally satisfied and dissatisfied' or better                                                                                                                             |                                                                                                                                                                                                                                                                                                                                                                                                                                                                                                           |          |                                              |                  |                              |                        |                                            |                           |                     |                      |                                                                                                                                                                                                                                                                                                                                                                                                                                                         |                     |                              |                               |                                                      |                                                                                                                                                                                                                                                                                                                                         |                                                      |                                            |                                  |                                                                                                                  |                |                                                                                             |                                                                                                                                                                           |                              |                                                                                                           |                                                                                                                 |
| 'Moderately dissatisfied'                  | 'About equally satisfied and dissatisfied' or better                                                                                                                             |                                                                                                                                                                                                                                                                                                                                                                                                                                                                                                           |          |                                              |                  |                              |                        |                                            |                           |                     |                      |                                                                                                                                                                                                                                                                                                                                                                                                                                                         |                     |                              |                               |                                                      |                                                                                                                                                                                                                                                                                                                                         |                                                      |                                            |                                  |                                                                                                                  |                |                                                                                             |                                                                                                                                                                           |                              |                                                                                                           |                                                                                                                 |
| 'About equally satisfied and dissatisfied' | 'Moderately satisfied' or better                                                                                                                                                 |                                                                                                                                                                                                                                                                                                                                                                                                                                                                                                           |          |                                              |                  |                              |                        |                                            |                           |                     |                      |                                                                                                                                                                                                                                                                                                                                                                                                                                                         |                     |                              |                               |                                                      |                                                                                                                                                                                                                                                                                                                                         |                                                      |                                            |                                  |                                                                                                                  |                |                                                                                             |                                                                                                                                                                           |                              |                                                                                                           |                                                                                                                 |

**eTable 2. Sensitivity Analysis of Missing at Random Assumption**

A sensitivity analysis was performed to examine the robustness of results with respect to the missing at random assumption. Among those missing vs. not missing assessment of satisfaction with sexual life at follow-up, the degree of satisfaction at other follow-ups did not appear to differ, after controlling for factors that were independently related to completeness of follow-up data (site, age, smoking, marital status). Likewise, among those missing vs. not missing IWQOL-lite Sexual Life score at follow-up, the mean Sexual Life score at other follow-ups was not significantly different. These results indicate that missing follow-up data was not related to the sexual functioning, and thus should not bias the results.

**Modeled Degree of Satisfaction with Sexual Life by Time Point by Whether that Outcome was Observed or Missing at Each Follow-up Assessment**

|                                  |                                    | Whether outcome known, by year of follow-up |                    |                      |                    |                      |                    |                      |                    |                      |                    |
|----------------------------------|------------------------------------|---------------------------------------------|--------------------|----------------------|--------------------|----------------------|--------------------|----------------------|--------------------|----------------------|--------------------|
|                                  |                                    | 1 Year                                      |                    | 2 Years              |                    | 3 Years              |                    | 4 Years              |                    | 5 Years              |                    |
| Satisfaction with sexual life, % |                                    | Observed<br>(N=1598)                        | Missing<br>(N=438) | Observed<br>(N=1396) | Missing<br>(N=640) | Observed<br>(N=1343) | Missing<br>(N=693) | Observed<br>(N=1279) | Missing<br>(N=757) | Observed<br>(N=1285) | Missing<br>(N=751) |
| <b>Baseline</b>                  | Very satisfied                     | 30.3(30.3-30.3)                             | 31.5(31.4-31.6)    | 29.7(29.6-29.7)      | 32.9(32.8-33.0)    | 29.0(29.0-29.1)      | 34.1(34.0-34.1)    | 30.3(30.3-30.3)      | 31.6(31.5-31.6)    | 29.5(29.5-29.5)      | 32.4(32.4-32.5)    |
|                                  | Moderately satisfied               | 20.2(20.1-20.2)                             | 18.9(18.9-19.0)    | 20.5(20.5-20.5)      | 18.3(18.3-18.3)    | 20.0(20.0-20.1)      | 19.0(18.9-19.0)    | 20.5(20.4-20.5)      | 18.4(18.3-18.4)    | 21.1(21.1-21.1)      | 17.4(17.4-17.5)    |
|                                  | Equally satisfied and dissatisfied | 21.2(21.2-21.2)                             | 21.8(21.8-21.9)    | 21.4(21.4-21.4)      | 21.5(21.4-21.5)    | 22.2(22.2-22.3)      | 20.0(19.9-20.0)    | 21.1(21.1-21.1)      | 21.9(21.9-22.0)    | 21.0(21.0-21.1)      | 22.2(22.2-22.2)    |
|                                  | Moderately dissatisfied            | 16.6(16.6-16.6)                             | 16.0(15.8-16.1)    | 16.4(16.4-16.5)      | 16.7(16.6-16.8)    | 16.4(16.4-16.5)      | 16.8(16.7-16.9)    | 16.5(16.5-16.5)      | 16.6(16.5-16.6)    | 16.7(16.6-16.7)      | 16.6(16.5-16.6)    |
|                                  | Very dissatisfied                  | 14.7(14.6-14.7)                             | 14.7(14.6-14.8)    | 14.5(14.5-14.5)      | 14.8(14.7-14.8)    | 15.1(15.1-15.1)      | 13.2(13.2-13.3)    | 14.2(14.1-14.2)      | 15.2(15.1-15.2)    | 14.1(14.1-14.1)      | 15.3(15.2-15.3)    |
|                                  | N missing                          | 71                                          | 63                 | 53                   | 81                 | 50                   | 84                 | 39                   | 95                 | 51                   | 83                 |
| <b>Year 1</b>                    | Very satisfied                     | -                                           | -                  | 12.4(12.4-12.4)      | 13.0(12.8-13.1)    | 11.4(11.4-11.5)      | 14.9(14.8-15.0)    | 12.4(12.4-12.4)      | 13.1(13.0-13.2)    | 11.7(11.7-11.7)      | 13.7(13.6-13.9)    |
|                                  | Moderately satisfied               | -                                           | -                  | 14.1(14.1-14.1)      | 12.6(12.5-12.7)    | 13.9(13.9-14.0)      | 13.7(13.6-13.7)    | 14.5(14.5-14.5)      | 12.4(12.4-12.5)    | 14.8(14.8-14.8)      | 12.0(11.9-12.1)    |
|                                  | Equally satisfied and dissatisfied | -                                           | -                  | 18.7(18.7-18.7)      | 18.4(18.3-18.4)    | 18.9(18.9-18.9)      | 18.2(18.2-18.3)    | 18.4(18.4-18.4)      | 18.8(18.7-18.8)    | 18.3(18.3-18.3)      | 19.1(19.0-19.1)    |
|                                  | Moderately dissatisfied            | -                                           | -                  | 24.9(24.8-24.9)      | 24.9(24.8-24.9)    | 24.7(24.6-24.7)      | 25.9(25.9-26.0)    | 25.1(25.1-25.1)      | 24.3(24.3-24.4)    | 25.6(25.5-25.6)      | 24.2(24.1-24.2)    |
|                                  | Very dissatisfied                  | -                                           | -                  | 32.4(32.4-32.4)      | 33.0(32.9-33.0)    | 33.5(33.5-33.5)      | 30.4(30.4-30.5)    | 31.6(31.5-31.6)      | 34.1(34.0-34.1)    | 31.8(31.8-31.8)      | 33.9(33.8-33.9)    |
|                                  | N missing                          | -                                           | -                  | 206                  | 232                | 204                  | 234                | 194                  | 244                | 222                  | 216                |
| <b>Year 2</b>                    | Very satisfied                     | 13.0(12.9-13.0)                             | 12.6(12.4-12.8)    | -                    | -                  | 12.2(12.2-12.2)      | 15.4(15.3-15.6)    | 13.2(13.1-13.2)      | 13.0(12.9-13.1)    | 12.4(12.4-12.5)      | 13.9(13.7-14.0)    |
|                                  | Moderately satisfied               | 13.4(13.3-13.4)                             | 13.0(12.9-13.1)    | -                    | -                  | 13.1(13.1-13.2)      | 13.6(13.5-13.7)    | 13.7(13.7-13.7)      | 12.2(12.2-12.3)    | 14.0(14.0-14.0)      | 11.6(11.5-11.7)    |
|                                  | Equally satisfied and dissatisfied | 21.8(21.8-21.8)                             | 21.7(21.6-21.8)    | -                    | -                  | 22.3(22.2-22.3)      | 20.6(20.5-20.6)    | 21.9(21.8-21.9)      | 21.6(21.6-21.7)    | 21.6(21.6-21.6)      | 22.5(22.5-22.6)    |
|                                  | Moderately dissatisfied            | 22.9(22.9-22.9)                             | 21.9(21.8-22.1)    | -                    | -                  | 22.6(22.6-22.7)      | 23.8(23.7-23.9)    | 22.9(22.9-23.0)      | 21.9(21.8-21.9)    | 23.3(23.2-23.3)      | 22.1(22.1-22.2)    |
|                                  | Very dissatisfied                  | 31.2(31.2-31.3)                             | 31.6(31.5-31.7)    | -                    | -                  | 32.0(32.0-32.0)      | 29.0(28.9-29.1)    | 30.6(30.6-30.7)      | 32.8(32.8-32.9)    | 30.9(30.9-30.9)      | 32.5(32.4-32.6)    |
|                                  | N missing                          | 408                                         | 232                | -                    | -                  | 263                  | 377                | 272                  | 368                | 274                  | 366                |
| <b>Year 3</b>                    | Very satisfied                     | 14.0(14.0-14.0)                             | 15.1(14.9-15.4)    | 14.1(14.0-14.1)      | 14.6(14.4-14.8)    | -                    | -                  | 14.4(14.3-14.4)      | 14.0(13.8-14.2)    | 13.7(13.6-13.7)      | 15.0(14.9-15.2)    |
|                                  | Moderately satisfied               | 14.1(14.1-14.1)                             | 13.1(12.9-13.3)    | 14.3(14.3-14.4)      | 12.9(12.8-12.9)    | -                    | -                  | 14.4(14.3-14.4)      | 12.4(12.3-12.5)    | 14.8(14.7-14.8)      | 11.8(11.6-11.9)    |
|                                  | Equally satisfied and dissatisfied | 21.0(21.0-21.0)                             | 22.3(22.2-22.5)    | 21.2(21.2-21.2)      | 21.2(21.1-21.3)    | -                    | -                  | 20.9(20.9-21.0)      | 21.5(21.4-21.6)    | 20.9(20.9-21.0)      | 22.1(22.0-22.1)    |
|                                  | Moderately dissatisfied            | 22.5(22.5-22.5)                             | 21.3(21.1-21.4)    | 22.2(22.2-22.2)      | 22.2(22.0-22.3)    | -                    | -                  | 22.5(22.5-22.5)      | 21.5(21.4-21.6)    | 22.5(22.5-22.5)      | 22.0(21.9-22.1)    |
|                                  | Very dissatisfied                  | 30.5(30.5-30.6)                             | 30.4(30.3-30.5)    | 30.3(30.2-30.3)      | 31.0(30.9-31.1)    | -                    | -                  | 29.8(29.8-29.8)      | 32.4(32.3-32.5)    | 30.0(30.0-30.0)      | 31.7(31.6-31.8)    |
|                                  | N missing                          | 459                                         | 234                | 316                  | 377                | -                    | -                  | 229                  | 464                | 263                  | 430                |
| <b>Year 4</b>                    | Very satisfied                     | 15.4(15.3-15.4)                             | 15.6(15.4-15.8)    | 15.4(15.4-15.5)      | 15.6(15.4-15.7)    | 14.9(14.8-14.9)      | 17.9(17.7-18.0)    | -                    | -                  | 14.9(14.9-14.9)      | 16.8(16.6-17.0)    |
|                                  | Moderately satisfied               | 13.6(13.6-13.6)                             | 12.6(12.4-12.8)    | 13.6(13.6-13.7)      | 12.7(12.6-12.8)    | 13.5(13.4-13.5)      | 12.9(12.8-13.1)    | -                    | -                  | 14.1(14.1-14.1)      | 11.2(11.1-11.4)    |
|                                  | Equally satisfied and dissatisfied | 21.4(21.4-21.4)                             | 22.2(22.0-22.3)    | 21.5(21.5-21.5)      | 21.7(21.7-21.8)    | 21.8(21.8-21.8)      | 20.6(20.5-20.7)    | -                    | -                  | 21.3(21.3-21.3)      | 22.2(22.1-22.2)    |
|                                  | Moderately dissatisfied            | 21.8(21.8-21.8)                             | 20.4(20.3-20.6)    | 21.6(21.5-21.6)      | 21.4(21.3-21.5)    | 21.4(21.4-21.4)      | 23.4(23.3-23.6)    | -                    | -                  | 21.7(21.7-21.8)      | 22.1(22.0-22.2)    |
|                                  | Very dissatisfied                  | 30.1(30.1-30.1)                             | 30.1(29.9-30.2)    | 30.0(30.0-30.0)      | 31.1(31.0-31.2)    | 30.7(30.6-30.7)      | 28.4(28.2-28.5)    | -                    | -                  | 29.7(29.6-29.7)      | 31.5(31.4-31.7)    |
|                                  | N missing                          | 513                                         | 244                | 389                  | 368                | 293                  | 464                | -                    | -                  | 264                  | 493                |
| <b>Year 5</b>                    | Very satisfied                     | 13.2(13.2-13.3)                             | 14.2(14.0-14.5)    | 13.3(13.2-13.3)      | 14.0(13.9-14.2)    | 12.7(12.7-12.8)      | 15.9(15.7-16.0)    | 13.6(13.6-13.7)      | 13.5(13.3-13.7)    | -                    | -                  |
|                                  | Moderately satisfied               | 15.6(15.5-15.6)                             | 14.9(14.7-15.0)    | 15.5(15.5-15.5)      | 14.7(14.7-14.8)    | 15.3(15.3-15.3)      | 15.4(15.3-15.5)    | 15.8(15.7-15.8)      | 13.9(13.8-14.0)    | -                    | -                  |
|                                  | Equally satisfied and dissatisfied | 21.1(21.1-21.1)                             | 21.9(21.8-22.0)    | 21.3(21.3-21.3)      | 21.7(21.6-21.8)    | 21.6(21.6-21.6)      | 21.6(21.6-21.6)    | 21.1(21.1-21.1)      | 21.5(21.4-21.6)    | -                    | -                  |
|                                  | Moderately dissatisfied            | 22.8(22.8-22.8)                             | 23.2(23.0-23.3)    | 22.6(22.6-22.6)      | 23.0(22.9-23.1)    | 22.5(22.5-22.6)      | 23.9(23.8-24.0)    | 22.9(22.8-22.9)      | 22.7(22.6-22.8)    | -                    | -                  |
|                                  | Very dissatisfied                  | 28.5(28.5-28.5)                             | 28.6(28.5-28.7)    | 28.3(28.3-28.4)      | 29.8(29.7-29.9)    | 29.1(29.0-29.1)      | 26.9(26.8-27.0)    | 28.0(28.0-28.0)      | 29.9(29.8-30.0)    | -                    | -                  |
|                                  | N missing                          | 535                                         | 216                | 385                  | 366                | 321                  | 430                | 258                  | 493                | -                    | -                  |

**eTable 3.** Mean IWQOL-lite Sexual Life Score by Time Point by Whether that Outcome was Observed or Missing at Each Follow-up Assessment

|                                             | Whether outcome known, by year of follow-up |                                |                                |                                |                                |                                |                                |                                |                                |                                |
|---------------------------------------------|---------------------------------------------|--------------------------------|--------------------------------|--------------------------------|--------------------------------|--------------------------------|--------------------------------|--------------------------------|--------------------------------|--------------------------------|
|                                             | 1 Year                                      |                                | 2 Years                        |                                | 3 Years                        |                                | 4 Years                        |                                | 5 Years                        |                                |
| IWQOL-Lite sexual life score, mean (95% CI) | Observed (N=1643)                           | Missing (N=393)                | Observed (N=1455)              | Missing (N=581)                | Observed (N=1367)              | Missing (N=669)                | Observed (N=1326)              | Missing (N=710)                | Observed (N=1345)              | Missing (N=691)                |
| <b>Baseline</b>                             | 52.2(50.1-54.2)<br>Missing=44               | 52.9(48.8-57.0)<br>Missing=47  | 52.1(49.9-54.3)<br>Missing=43  | 51.8(48.4-55.2)<br>Missing=48  | 51.7(49.4-53.9)<br>Missing=45  | 53.4(50.4-56.4)<br>Missing=46  | 51.9(49.6-54.3)<br>Missing=42  | 52.5(49.6-55.4)<br>Missing=49  | 52.5(50.2-54.8)<br>Missing=41  | 52.1(49.1-55.1)<br>Missing=50  |
| <b>Year 1</b>                               | -                                           | -                              | 81.3(79.3-83.3)<br>Missing=203 | 82.1(78.9-85.3)<br>Missing=190 | 81.2(79.1-83.3)<br>Missing=177 | 82.2(79.4-84.9)<br>Missing=216 | 81.0(79.0-83.1)<br>Missing=184 | 82.4(79.6-85.2)<br>Missing=209 | 81.9(78.9-84.0)<br>Missing=210 | 80.9(78.1-83.7)<br>Missing=183 |
| <b>Year 2</b>                               | 82.7(80.7-84.6)<br>Missing=391              | 82.2(78.3-86.1)<br>Missing=190 | -                              | -                              | 82.9(80.8-84.9)<br>Missing=249 | 82.7(79.8-85.7)<br>Missing=332 | 82.5(80.3-84.6)<br>Missing=266 | 83.0(80.2-85.9)<br>Missing=315 | 83.5(81.4-85.6)<br>Missing=265 | 81.0(78.1-83.9)<br>Missing=316 |
| <b>Year 3</b>                               | 80.8(78.9-82.8)<br>Missing=453              | 84.7(80.6-88.8)<br>Missing=216 | 81.7(79.7-83.7)<br>Missing=337 | 79.4(75.8-83.0)<br>Missing=332 | -                              | -                              | 80.9(78.8-83.0)<br>Missing=238 | 82.8(79.5-86.1)<br>Missing=431 | 82.3(80.2-84.4)<br>Missing=274 | 79.2(76.0-82.5)<br>Missing=395 |
| <b>Year 4</b>                               | 79.9(77.9-81.9)<br>Missing=501              | 77.7(73.1-82.2)<br>Missing=209 | 80.2(78.1-82.3)<br>Missing=395 | 77.6(73.8-81.3)<br>Missing=315 | 80.2(78.0-82.4)<br>Missing=279 | 77.8(74.2-81.3)<br>Missing=431 | -                              | -                              | 80.7(78.6-82.9)<br>Missing=263 | 77.4(73.8-81.0)<br>Missing=447 |
| <b>Year 5</b>                               | 77.6(75.6-79.7)<br>Missing=508              | 81.2(77.1-85.3)<br>Missing=183 | 78.1(76.0-80.3)<br>Missing=375 | 78.0(74.4-81.6)<br>Missing=316 | 78.4(76.2-80.6)<br>Missing=296 | 77.7(74.1-81.3)<br>Missing=395 | 77.9(75.7-80.2)<br>Missing=244 | 78.3(74.8-85.4)<br>Missing=447 | -                              | -                              |

Abbreviations: IWQOL, Impact of Weight on Quality of Life.

**eTable 4. Demographic and Clinical Characteristics of Adults Prior to Bariatric Surgery, by Sex.**

| Characteristic                                                                            | Women (N=1607) <sup>a</sup> |                | Men (N=429) <sup>a</sup> |                |
|-------------------------------------------------------------------------------------------|-----------------------------|----------------|--------------------------|----------------|
|                                                                                           | No.                         | % <sup>b</sup> | No.                      | % <sup>b</sup> |
| Age, years, median (IQR)                                                                  | 46.0                        | (37.0-54.0)    | 50.0                     | (39.0-58.0)    |
| Race                                                                                      | (n=1591)                    |                | (n=424)                  |                |
| White                                                                                     | 1362                        | (85.6)         | 393                      | (92.7)         |
| Black                                                                                     | 177                         | (11.1)         | 24                       | (5.7)          |
| Other <sup>c</sup>                                                                        | 52                          | (3.3)          | 7                        | (1.7)          |
| Hispanic/Latino ethnicity, No./total (%)                                                  | 79/1606                     | (4.9)          | 15/428                   | (3.5)          |
| Education                                                                                 | (n=1600)                    |                | (n=427)                  |                |
| High school or less                                                                       | 374                         | (23.4)         | 94                       | (22.0)         |
| Some college/post high school education                                                   | 642                         | (40.1)         | 166                      | (38.9)         |
| College degree or higher                                                                  | 584                         | (36.5)         | 167                      | (39.1)         |
| Marital status                                                                            | (n=1600)                    |                | (n=428)                  |                |
| Married/living as married                                                                 | 993                         | (62.0)         | 310                      | (72.4)         |
| Divorced/separated                                                                        | 304                         | (19.0)         | 54                       | (12.6)         |
| Widowed                                                                                   | 43                          | (2.7)          | 2                        | (0.5)          |
| Never married                                                                             | 260                         | (16.3)         | 62                       | (14.5)         |
| Current or recent smoker, No./total (%)                                                   | 211/1605                    | (13.1)         | 37/428                   | (8.6)          |
| Alcohol use disorder symptoms, No./total(%)                                               | 104/1598                    | (6.5)          | 33/428                   | (7.7)          |
| Body mass index, median (IQR)                                                             | 45.5                        | (41.6-50.8)    | 46.9                     | (42.6-52.7)    |
| Beck Depression Inventory Score, median (IQR)                                             | 6.0                         | (3.0-11.0)     | 5.0                      | (2.0-10.0)     |
| Missing                                                                                   | 92                          |                | 26                       |                |
| Diabetes status                                                                           | (n=1523)                    |                | (n=401)                  |                |
| Diabetes with insulin                                                                     | 151                         | (9.9)          | 84                       | (20.9)         |
| Diabetes without insulin                                                                  | 301                         | (19.8)         | 99                       | (24.7)         |
| No diabetes                                                                               | 1071                        | (70.3)         | 218                      | (52.4)         |
| Hypertension, No./total(%)                                                                | 1011/1568                   | (64.5)         | 340/422                  | (80.6)         |
| Dyslipidemia, No./total(%)                                                                | 756/1313                    | (57.6)         | 299/358                  | (83.5)         |
| Sleep apnea, No./total(%)                                                                 | 770/1606                    | (47.9)         | 329/429                  | (76.7)         |
| Cardiovascular disease, No./total(%)                                                      | 85/1605                     | (5.3)          | 80/429                   | (18.7)         |
| Urinary incontinence, No./total(%)                                                        | 783/1597                    | (49.0)         | 93/424                   | (21.9)         |
| Menopausal status                                                                         |                             |                | NA                       |                |
| No                                                                                        | 833                         | (51.8)         |                          |                |
| Yes                                                                                       | 494                         | (30.7)         |                          |                |
| Unknown                                                                                   | 280                         | (17.4)         |                          |                |
| Prior live or still birth, No./total (%)                                                  | 1066/1458                   | (73.1)         | NA                       |                |
| Antidepressants medications that may impair sexual function <sup>d</sup> , No./total(%)   | 570/1570                    | (36.3)         | 103/414                  | (24.9)         |
| Antihypertensive medications that may impair sexual function <sup>e</sup> , No./total(%)  | NA                          |                | 148/416                  | (35.6)         |
| Medications that may improve sexual function <sup>f</sup> , No./total(%)                  | 111/1563                    | (7.1)          | 28/418                   | (6.7)          |
| Other hormonal medications that may influence sexual function <sup>g</sup> , No./total(%) | 108/1588                    | (6.8)          | NA                       |                |
| Surgical Procedure                                                                        |                             |                |                          |                |
| RYGB                                                                                      | 1154                        | (71.8)         | 288                      | (67.1)         |
| LAGB                                                                                      | 391                         | (24.3)         | 115                      | (26.8)         |
| Other                                                                                     | 62 <sup>h</sup>             | (3.9)          | 26 <sup>i</sup>          | (6.1)          |

Abbreviations: IQR, interquartile range; LAGB, laparoscopic adjustable gastric band; NA, not applicable; RYGB, Roux-en-Y gastric bypass.

<sup>a</sup>Denominators shift between variables because of missing data.

<sup>b</sup>Data are expressed at No. (%) unless otherwise indicated.

<sup>c</sup>Combined due to small numbers: Asian, American Indian/Alaska Native, Native Hawaiian/other Pacific Islander, multiple races.

<sup>d</sup>Antidepressant medications other than bupropion, trazodone, mirtazapine or nefazodone.

<sup>e</sup>Beta-adrenergic blockers and diuretics.

<sup>f</sup>Bupropion. Among men only, also phosphodiesterase type 5 inhibitors (PDE-5) and androgens. All men who were on a PDE-5 or an androgen were also on bupropion at the same visit.

<sup>g</sup>Estrogens, progestins, and androgens, either alone or in combination.

<sup>h</sup>Sleeve gastrectomy (n=30), banded Roux-en-Y gastric bypass (n=11) and biliopancreatic diversion with duodenal switch (n=21) were combined due to the low frequency of each.

<sup>i</sup>Sleeve gastrectomy (n=15), banded Roux-en-Y gastric bypass (n=3) and biliopancreatic diversion with duodenal switch (n=8) were combined due to the low frequency of each.

**eTable 5. Baseline Demographic and Clinical Characteristics of Participants Included in and Excluded from Analysis sample**

| Characteristic                                                             | Women                                    |                |                     | Men         |                                         |         |                    |        |             |       |
|----------------------------------------------------------------------------|------------------------------------------|----------------|---------------------|-------------|-----------------------------------------|---------|--------------------|--------|-------------|-------|
|                                                                            | Analysis sample<br>(N=1607) <sup>a</sup> |                | Excluded<br>(N=324) | P           | Analysis sample<br>(N=429) <sup>a</sup> |         | Excluded<br>(N=98) |        |             |       |
|                                                                            | No.                                      | % <sup>b</sup> | No.                 |             | % <sup>b</sup>                          | No.     | % <sup>b</sup>     |        |             |       |
| Age, years, median (IQR)                                                   | 46.0                                     | (37.0-54.0)    | 42.0                | (35.0-51.0) | <.001                                   | 50.0    | (39.0-58.0)        | 44.0   | (38.0-51.0) | 0.001 |
| Race                                                                       | (n=1591)                                 |                | (n=321)             |             | 0.14                                    | (n=424) |                    | (n=97) |             | 0.40  |
| White                                                                      | 1362                                     | (85.6)         | 261                 | (81.3)      |                                         | 393     | (92.7)             | 86     | (88.7)      |       |
| Black                                                                      | 177                                      | (11.1)         | 47                  | (14.6)      |                                         | 24      | (5.7)              | 8      | (8.2)       |       |
| Other                                                                      | 52                                       | (3.3)          | 13                  | (4.0)       |                                         | 7       | (1.7)              | 3      | (3.1)       |       |
| Hispanic/Latino ethnicity, No./total (%)                                   | 79/1606                                  | (4.9)          | 22/324              | (6.8)       | 0.17                                    | 15/428  | (3.5)              | 3/98   | (3.1)       | 0.83  |
| Education                                                                  | (n=1600)                                 |                | (n=179)             |             | 0.48                                    | (n=427) |                    | (n=58) |             | 0.43  |
| High school or less                                                        | 374                                      | (23.4)         | 38                  | (21.2)      |                                         | 94      | (22.0)             | 15     | (25.9)      |       |
| Some college/post high school education                                    | 642                                      | (40.1)         | 87                  | (48.6)      |                                         | 166     | (38.9)             | 23     | (39.7)      |       |
| College degree or higher                                                   | 584                                      | (36.5)         | 54                  | (30.2)      |                                         | 167     | (39.1)             | 20     | (34.5)      |       |
| Marital status                                                             | (n=1600)                                 |                | (n=178)             |             | 0.86                                    | (n=428) |                    | (n=58) |             | 0.75  |
| Married/living as married                                                  | 993                                      | (62.0)         | 103                 | (57.9)      |                                         | 310     | (72.4)             | 38     | (65.5)      |       |
| Divorced/separated                                                         | 304                                      | (19.0)         | 35                  | (19.7)      |                                         | 54      | (12.6)             | 9      | (15.5)      |       |
| Widowed                                                                    | 43                                       | (2.7)          | 5                   | (2.8)       |                                         | 2       | (0.5)              | 1      | (1.7)       |       |
| Never married                                                              | 260                                      | (16.3)         | 35                  | (19.7)      |                                         | 62      | (14.5)             | 10     | (17.2)      |       |
| Current or recent smoker, No./total (%)                                    | 211/1605                                 | (13.1)         | 54/323              | (16.7)      | 0.09                                    | 37/428  | (8.6)              | 22/98  | (22.4)      | <.001 |
| Alcohol use disorder symptoms, No./total (%)                               | 104/1598                                 | (6.5)          | 8/175               | (4.6)       | 0.32                                    | 33/428  | (7.7)              | 3/55   | (5.5)       | 0.55  |
| Body mass index, kg/m <sup>2</sup> , median (IQR)                          | 45.5                                     | (41.6-50.8)    | 46.5                | (42.0-52.2) | 0.03                                    | 46.9    | (42.6-52.7)        | 46.9   | (40.9-53.8) | 0.81  |
| Beck Depression Inventory Score, median (IQR)                              | 6.0                                      | (3.0-11.0)     | 7                   | (3.0-12.0)  | 0.50                                    | 5.0     | (2.0-10.0)         | 7      | (3.0-12.0)  | 0.054 |
| Missing                                                                    | 92                                       |                | 50                  |             |                                         | 26      |                    | 13     |             |       |
| Diabetes status                                                            | (n=1523)                                 |                | (n=155)             |             | 0.23                                    | (n=401) |                    | (n=51) |             | 0.33  |
| Diabetes with insulin                                                      | 151                                      | (9.9)          | 12                  | (7.7)       |                                         | 84      | (20.9)             | 7      | (13.7)      |       |
| Diabetes without insulin                                                   | 301                                      | (19.8)         | 39                  | (25.2)      |                                         | 99      | (24.7)             | 11     | (21.6)      |       |
| No Diabetes                                                                | 1071                                     | (70.3)         | 104                 | (67.1)      |                                         | 218     | (52.4)             | 33     | (64.7)      |       |
| Hypertension, No./total (%)                                                | 1011/1568                                | (64.5)         | 179/288             | (62.2)      | 0.45                                    | 340/422 | (80.6)             | 71/94  | (75.5)      | 0.27  |
| Dyslipidemia, No./total (%)                                                | 756/1313                                 | (57.6)         | 137/228             | (60.1)      | 0.48                                    | 299/358 | (83.5)             | 62/77  | (80.5)      | 0.53  |
| Sleep apnea, No./total (%)                                                 | 770/1606                                 | (47.9)         | 134/323             | (41.5)      | 0.03                                    | 329/429 | (76.7)             | 55/97  | (56.7)      | <.001 |
| Cardiovascular disease, No./total (%)                                      | 85/1605                                  | (5.3)          | 1/88                | (1.1)       | 0.44                                    | 80/429  | (18.7)             | 1/23   | (4.4)       | 0.03  |
| Urinary incontinence, No./total (%)                                        | 783/1597                                 | (49.0)         | 79/166              | (47.6)      | 0.7                                     | 93/424  | (21.9)             | 7/53   | (13.2)      | 0.14  |
| Menopausal status                                                          |                                          |                |                     |             |                                         | NA      |                    | NA     |             |       |
| No                                                                         | 833                                      | (51.8)         | 107                 | (33.0)      | <.001                                   |         |                    |        |             |       |
| Yes                                                                        | 494                                      | (30.7)         | 25                  | (7.7)       |                                         |         |                    |        |             |       |
| Unknown                                                                    | 280                                      | (17.4)         | 192                 | (59.3)      |                                         |         |                    |        |             |       |
| Prior live or still birth                                                  | 1066/1458                                | (73.1)         | 228/306             | (74.5)      |                                         | NA      |                    | NA     |             |       |
| Antidepressants- impair function <sup>a</sup> , no./total (%)              | 570/1570                                 | (36.3)         | 74/195              | (37.9)      | 0.62                                    | 103/414 | (24.9)             | 18/65  | (27.7)      | 0.63  |
| Antihypertensives- impair function <sup>b</sup> , no./total(%)             | NA                                       |                | NA                  |             | 0.6                                     | 148/416 | (35.6)             | 21/64  | (32.8)      | 0.67  |
| Medications- improve function <sup>c</sup> , no./total (%)                 | 111/1563                                 | (7.1)          | 14/197              | (7.1)       | 4                                       | 28/418  | (6.7)              | 7/65   | (10.8)      | 0.24  |
| Other hormonal medications- influence unknown <sup>d</sup> , no./total (%) | 108/1588                                 | (6.8)          | 9/196               | (4.6)       | 0.9                                     | NA      |                    | NA     |             |       |
| Surgical Procedure                                                         |                                          |                |                     |             | 9                                       |         |                    |        |             | 0.33  |
| RYGB                                                                       | 1154                                     | (71.8)         | 235                 | (72.5)      | 0.24                                    | 288     | (67.1)             | 61     | (62.2)      |       |
| LAGB                                                                       | 391                                      | (24.3)         | 74                  | (22.8)      |                                         | 115     | (26.8)             | 30     | (30.6)      |       |
| Other                                                                      | 62                                       | (3.9)          | 15                  | (4.6)       | 0.7                                     | 26      | (6.1)              | 7      | (7.1)       |       |
| Frequency of sexual desire                                                 | (n=1563)                                 |                | (n=141)             |             | 5                                       | (n=425) |                    | (n=45) |             | 0.71  |
| Not at all                                                                 | 401                                      | (25.7)         | 36                  | (25.5)      |                                         | 47      | (11.1)             | 8      | (17.8)      |       |
| Once a month                                                               | 376                                      | (24.1)         | 25                  | (17.7)      |                                         | 43      | (10.1)             | 3      | (6.7)       |       |
| Once a week                                                                | 312                                      | (20.0)         | 34                  | (24.1)      |                                         | 81      | (19.1)             | 5      | (11.1)      |       |
| A few times a week                                                         | 371                                      | (23.7)         | 31                  | (22.0)      | 0.25                                    | 157     | (36.9)             | 13     | (28.9)      |       |
| At least once a day                                                        | 103                                      | (6.6)          | 15                  | (10.6)      |                                         | 97      | (22.8)             | 16     | (35.6)      |       |
| Frequency of sexual activity                                               | (n=1571)                                 |                | (n=141)             |             |                                         | (n=424) |                    | (n=45) |             | 0.01  |
| Not at all                                                                 | 540                                      | (34.4)         | 46                  | (32.6)      |                                         | 107     | (25.2)             | 8      | (17.8)      |       |
| Once a month                                                               | 359                                      | (22.9)         | 28                  | (19.9)      |                                         | 62      | (14.6)             | 4      | (8.9)       |       |
| Once a week                                                                | 364                                      | (23.2)         | 35                  | (24.8)      |                                         | 102     | (24.1)             | 9      | (20.0)      |       |
| A few times a week                                                         | 264                                      | (16.8)         | 29                  | (20.6)      | 0.39                                    | 123     | (29.0)             | 15     | (33.3)      |       |
| At least once a day                                                        | 44                                       | (2.8)          | 3                   | (2.1)       |                                         | 30      | (7.1)              | 9      | (20.0)      |       |
| Physical health limited sex                                                | (n=1516)                                 |                | (n=137)             |             |                                         | (n=411) |                    | (n=42) |             | 0.37  |
| Extremely                                                                  | 612                                      | (40.4)         | 41                  | (29.9)      |                                         | 142     | (34.6)             | 20     | (47.6)      |       |
| Quite a bit                                                                | 330                                      | (21.8)         | 38                  | (27.7)      |                                         | 89      | (21.7)             | 6      | (11.9)      |       |
| Moderately                                                                 | 222                                      | (14.6)         | 17                  | (12.4)      |                                         | 68      | (16.6)             | 7      | (16.7)      |       |
| Slightly                                                                   | 187                                      | (12.3)         | 18                  | (13.1)      | 0.03                                    | 60      | (14.6)             | 6      | (11.9)      |       |
| Not at all                                                                 | 165                                      | (10.9)         | 23                  | (16.8)      |                                         | 52      | (12.7)             | 5      | (11.9)      |       |
| Satisfaction with sex life                                                 | (n=1488)                                 |                | (n=133)             |             |                                         | (n=414) |                    | (n=42) |             | 0.63  |
| Very dissatisfied                                                          | 425                                      | (28.6)         | 13                  | (9.8)       |                                         | 151     | (36.5)             | 16     | (38.1)      |       |
| Moderately dissatisfied                                                    | 297                                      | (20.0)         | 25                  | (18.8)      |                                         | 73      | (17.6)             | 6      | (14.3)      |       |
| About equally satisfied and dissatisfied                                   | 311                                      | (20.9)         | 24                  | (18.1)      |                                         | 83      | (20.1)             | 6      | (14.3)      |       |
| Moderately satisfied                                                       | 236                                      | (15.9)         | 26                  | (19.6)      | 0.18                                    | 70      | (16.9)             | 9      | (21.4)      |       |
| Very satisfied                                                             | 219                                      | (14.7)         | 45                  | (33.8)      |                                         | 37      | (8.9)              | 5      | (11.9)      |       |
| IWQOL-Lite sexual score, median (IQR)                                      | 50                                       | (25-75)        | 50                  | (25-75)     |                                         | 63      | (31-88)            | 69     | (31-88)     | 0.43  |

Abbreviations: IQR, interquartile range; IWQOL, Impact of Weight on Quality of Life; NA, not applicable.

Values are expressed as no. (%) unless otherwise indicated. The number of participants across categories may not sum to the total number of participants due to missing data.

<sup>a</sup>Antidepressant medications that may impair sexual function; those other than bupropion, trazodone, mirtazapine or nefazodone.

<sup>b</sup>Antihypertensives that may impair sexual function; including beta-adrenergic blockers and diuretics.

<sup>c</sup>Bupropion. Among men only, also phosphodiesterase type 5 inhibitors and androgens.

<sup>d</sup>Hormonal Medications that may influence sexual function; estrogens, progestins, and androgens, either alone or in combination.



**eTable 6.** Observed Parameters of Sexual Function Before and After Bariatric Surgery, by Sex.

|                                                                                      | Baseline |              | 1 Year |               | 2 Years |               | 3 Years |               | 4 Years |               | 5 Years |               |
|--------------------------------------------------------------------------------------|----------|--------------|--------|---------------|---------|---------------|---------|---------------|---------|---------------|---------|---------------|
|                                                                                      | No.      | (%)          | No.    | (%)           | No.     | (%)           | No.     | (%)           | No.     | (%)           | No.     | (%)           |
| <b>Women</b>                                                                         | 1607     |              | 1356   |               | 1204    |               | 1154    |               | 1131    |               | 1152    |               |
| <i>In the past month...</i>                                                          |          |              |        |               |         |               |         |               |         |               |         |               |
| <b>Frequency of sexual desire</b>                                                    |          |              |        |               |         |               |         |               |         |               |         |               |
| Not at all                                                                           | 389      | (25.2)       | 254    | (19.8)        | 230     | (20.2)        | 254     | (23.4)        | 251     | (23.8)        | 276     | (25.8)        |
| Once a month                                                                         | 375      | (24.3)       | 232    | (18.0)        | 228     | (20.0)        | 211     | (19.4)        | 210     | (19.9)        | 209     | (19.5)        |
| Once a week                                                                          | 311      | (20.1)       | 281    | (21.9)        | 249     | (21.9)        | 231     | (21.2)        | 217     | (20.6)        | 245     | (22.9)        |
| A few times a week                                                                   | 367      | (23.8)       | 397    | (30.9)        | 340     | (29.9)        | 310     | (28.5)        | 297     | (28.2)        | 281     | (26.3)        |
| At least once a day                                                                  | 102      | (6.6)        | 122    | (9.5)         | 91      | (8.0)         | 82      | (7.5)         | 78      | (7.4)         | 59      | (5.5)         |
| <b>Frequency of sexual activity</b>                                                  |          |              |        |               |         |               |         |               |         |               |         |               |
| Not at all                                                                           | 531      | (34.2)       | 361    | (28.0)        | 316     | (27.6)        | 301     | (27.6)        | 320     | (30.2)        | 338     | (31.4)        |
| Once a month                                                                         | 356      | (22.9)       | 222    | (17.2)        | 225     | (19.6)        | 212     | (19.5)        | 199     | (18.8)        | 229     | (21.3)        |
| Once a week                                                                          | 362      | (23.3)       | 326    | (25.2)        | 280     | (24.4)        | 282     | (25.9)        | 263     | (24.8)        | 255     | (23.7)        |
| A few times a week                                                                   | 260      | (16.8)       | 326    | (25.2)        | 281     | (24.5)        | 260     | (23.9)        | 250     | (23.6)        | 230     | (21.4)        |
| At least once a day                                                                  | 43       | (2.8)        | 58     | (4.5)         | 45      | (3.9)         | 34      | (3.1)         | 27      | (2.6)         | 23      | (2.1)         |
| <b>Reason for no sexual activity</b>                                                 |          |              |        |               |         |               |         |               |         |               |         |               |
| Too tired/ not interested                                                            | 278      | (18.2)       | 130    | (10.3)        | 141     | (12.7)        | 153     | (14.6)        | 161     | (15.7)        | 183     | (17.6)        |
| Physical problems                                                                    | 110      | (7.2)        | 57     | (4.5)         | 55      | (5.0)         | 47      | (4.5)         | 48      | (4.7)         | 44      | (4.3)         |
| No partner or partner not physically present                                         | 222      | (14.5)       | 192    | (15.1)        | 149     | (13.4)        | 127     | (11.9)        | 123     | (11.9)        | 152     | (14.5)        |
| Partner not interested                                                               | 90       | (5.9)        | 53     | (4.2)         | 45      | (4.1)         | 48      | (4.6)         | 64      | (6.3)         | 56      | (5.5)         |
| <b>Physical health limits sexual activity</b>                                        |          |              |        |               |         |               |         |               |         |               |         |               |
| Extremely                                                                            | 162      | (10.8)       | 37     | (3.0)         | 38      | (3.5)         | 40      | (3.9)         | 52      | (5.1)         | 37      | (3.6)         |
| Quite a bit                                                                          | 185      | (12.4)       | 42     | (3.4)         | 49      | (4.5)         | 45      | (4.4)         | 36      | (3.6)         | 63      | (6.2)         |
| Moderately                                                                           | 220      | (14.7)       | 58     | (4.7)         | 63      | (5.8)         | 59      | (5.7)         | 55      | (5.4)         | 67      | (6.6)         |
| Slightly                                                                             | 330      | (22.0)       | 160    | (13.0)        | 143     | (13.2)        | 144     | (13.9)        | 150     | (14.8)        | 137     | (13.5)        |
| Not at all                                                                           | 601      | (40.1)       | 932    | (75.8)        | 789     | (72.9)        | 745     | (72.1)        | 719     | (71.1)        | 713     | (70.1)        |
| <b>Ways that physical health limited sexual activity</b>                             |          |              |        |               |         |               |         |               |         |               |         |               |
| Fatigue or low energy/not interested                                                 | 771      | (52.1)       | 220    | (18.1)        | 232     | (21.6)        | 238     | (23.3)        | 242     | (24.2)        | 254     | (25.4)        |
| Pain/discomfort/fear of damaging health                                              | 302      | (20.7)       | 135    | (11.2)        | 125     | (11.8)        | 143     | (14.1)        | 150     | (15.1)        | 155     | (15.5)        |
| Embarrassment/fear of hurting partner                                                | 467      | (31.9)       | 85     | (7.1)         | 73      | (6.9)         | 75      | (7.4)         | 88      | (9.0)         | 81      | (8.2)         |
| Difficulty having orgasm/difficulty becoming aroused/difficulty with lubrication     | 555      | (37.9)       | 175    | (14.4)        | 181     | (17.0)        | 170     | (16.8)        | 190     | (19.2)        | 191     | (19.1)        |
| <b>Satisfaction with sex life</b>                                                    |          |              |        |               |         |               |         |               |         |               |         |               |
| Very dissatisfied                                                                    | 418      | (28.6)       | 165    | (14.0)        | 149     | (14.2)        | 161     | (15.9)        | 179     | (18.3)        | 153     | (15.7)        |
| Moderately dissatisfied                                                              | 295      | (20.2)       | 154    | (13.0)        | 139     | (13.3)        | 141     | (13.9)        | 117     | (12.0)        | 152     | (15.6)        |
| About equally satisfied and dissatisfied                                             | 307      | (21.0)       | 213    | (18.0)        | 235     | (22.4)        | 207     | (20.4)        | 206     | (21.1)        | 202     | (20.7)        |
| Moderately satisfied                                                                 | 231      | (15.8)       | 298    | (25.2)        | 222     | (21.2)        | 213     | (21.0)        | 197     | (20.1)        | 210     | (21.6)        |
| Very satisfied                                                                       | 213      | (14.6)       | 352    | (29.8)        | 304     | (29.0)        | 292     | (28.8)        | 278     | (28.5)        | 257     | (26.4)        |
| <b>IWQOL-Lite Sexual Score (median, 25<sup>th</sup>, 75<sup>th</sup> percentile)</b> | 50.0     | (25.0, 75.0) | 100.0  | (68.8, 100.0) | 100.0   | (75.0, 100.0) | 100.0   | (68.8, 100.0) | 100.0   | (62.5, 100.0) | 93.8    | (62.5, 100.0) |

Table is continued on the next page.

**eTable 6 Continued.** Observed Parameters of Sexual Function Before and After Bariatric Surgery, by Sex.

|                                                                                      | Baseline |              | 1 year |              | 2 years |              | 3 years |              | 4 years |              | 5 years |              |
|--------------------------------------------------------------------------------------|----------|--------------|--------|--------------|---------|--------------|---------|--------------|---------|--------------|---------|--------------|
|                                                                                      | No.      | (%)          | No.    | (%)          | No.     | (%)          | No.     | (%)          | No.     | (%)          | No.     | (%)          |
| <b>Men</b>                                                                           | 429      |              | 365    |              | 314     |              | 293     |              | 282     |              | 279     |              |
| <i>In the past month...</i>                                                          |          |              |        |              |         |              |         |              |         |              |         |              |
| <b>Frequency of sexual desire</b>                                                    |          |              |        |              |         |              |         |              |         |              |         |              |
| Not at all                                                                           | 45       | (10.7)       | 24     | (6.8)        | 17      | (5.6)        | 18      | (6.4)        | 18      | (6.7)        | 24      | (8.9)        |
| Once a month                                                                         | 42       | (10.0)       | 17     | (4.8)        | 22      | (7.2)        | 17      | (6.0)        | 13      | (4.9)        | 26      | (9.6)        |
| Once a week                                                                          | 80       | (19.0)       | 57     | (16.2)       | 53      | (17.4)       | 52      | (18.4)       | 52      | (19.5)       | 47      | (17.4)       |
| A few times a week                                                                   | 157      | (37.3)       | 156    | (44.3)       | 131     | (43.0)       | 119     | (42.1)       | 109     | (40.8)       | 100     | (37.0)       |
| At least once a day                                                                  | 97       | (23.0)       | 98     | (27.8)       | 82      | (26.9)       | 77      | (27.2)       | 75      | (28.1)       | 73      | (27.0)       |
| <b>Frequency of sexual activity</b>                                                  |          |              |        |              |         |              |         |              |         |              |         |              |
| Not at all                                                                           | 104      | (24.8)       | 51     | (14.5)       | 47      | (15.6)       | 47      | (16.7)       | 39      | (14.9)       | 39      | (14.7)       |
| Once a month                                                                         | 62       | (14.8)       | 39     | (11.1)       | 41      | (13.6)       | 35      | (12.5)       | 32      | (12.3)       | 43      | (16.2)       |
| Once a week                                                                          | 101      | (24.1)       | 97     | (27.6)       | 65      | (21.6)       | 63      | (22.4)       | 63      | (24.1)       | 58      | (21.9)       |
| A few times a week                                                                   | 123      | (29.3)       | 123    | (35.0)       | 115     | (38.2)       | 111     | (39.5)       | 97      | (37.2)       | 97      | (36.6)       |
| At least once a day                                                                  | 30       | (7.1)        | 41     | (11.7)       | 33      | (11.0)       | 25      | (8.9)        | 30      | (11.5)       | 28      | (10.6)       |
| <b>Reason for no sexual activity</b>                                                 |          |              |        |              |         |              |         |              |         |              |         |              |
| Too tired/ not interested                                                            | 33       | (8.0)        | 10     | (2.9)        | 8       | (2.7)        | 7       | (2.6)        | 11      | (4.3)        | 13      | (4.9)        |
| Physical problems                                                                    | 52       | (12.6)       | 12     | (3.5)        | 13      | (4.4)        | 18      | (6.6)        | 18      | (7.0)        | 17      | (6.4)        |
| No partner or partner not physically present                                         | 28       | (6.8)        | 18     | (5.3)        | 13      | (4.4)        | 11      | (4.0)        | 10      | (3.9)        | 14      | (5.3)        |
| Partner not interested                                                               | 29       | (7.0)        | 13     | (3.8)        | 10      | (3.4)        | 9       | (3.4)        | 10      | (3.9)        | 12      | (4.6)        |
| <b>Physical health limited sex</b>                                                   |          |              |        |              |         |              |         |              |         |              |         |              |
| Extremely                                                                            | 60       | (14.7)       | 12     | (3.5)        | 11      | (3.7)        | 18      | (6.5)        | 18      | (6.8)        | 16      | (6.1)        |
| Quite a bit                                                                          | 67       | (16.5)       | 27     | (7.9)        | 16      | (5.4)        | 19      | (6.8)        | 25      | (9.4)        | 21      | (8.1)        |
| Moderately                                                                           | 52       | (12.8)       | 13     | (3.8)        | 17      | (5.8)        | 14      | (5.0)        | 12      | (4.5)        | 18      | (6.9)        |
| Slightly                                                                             | 89       | (21.9)       | 47     | (13.7)       | 36      | (12.2)       | 37      | (13.3)       | 33      | (12.5)       | 32      | (12.3)       |
| Not at all                                                                           | 139      | (34.2)       | 243    | (71.1)       | 214     | (72.8)       | 190     | (68.4)       | 177     | (66.8)       | 174     | (66.7)       |
| <b>Ways that physical health limited sexual activity</b>                             |          |              |        |              |         |              |         |              |         |              |         |              |
| Fatigue or low energy/not interested                                                 | 185      | (46.5)       | 55     | (16.3)       | 37      | (13.1)       | 49      | (18.0)       | 51      | (19.8)       | 54      | (21.2)       |
| Pain/discomfort/fear of damaging health                                              | 59       | (15.3)       | 28     | (8.4)        | 18      | (6.4)        | 23      | (8.5)        | 24      | (9.3)        | 28      | (11.0)       |
| Embarrassment/fear of hurting partner                                                | 123      | (31.3)       | 26     | (7.8)        | 17      | (6.1)        | 23      | (8.6)        | 22      | (8.6)        | 24      | (9.4)        |
| Difficulty having orgasm/difficulty becoming aroused/difficulty with lubrication     | 186      | (46.4)       | 74     | (21.8)       | 56      | (19.4)       | 61      | (22.3)       | 66      | (25.4)       | 57      | (22.1)       |
| <b>Satisfaction with sex life</b>                                                    |          |              |        |              |         |              |         |              |         |              |         |              |
| Very dissatisfied                                                                    | 36       | (8.8)        | 98     | (28.4)       | 77      | (26.2)       | 63      | (22.6)       | 54      | (20.5)       | 65      | (25.0)       |
| Moderately dissatisfied                                                              | 69       | (16.8)       | 80     | (23.2)       | 73      | (24.8)       | 66      | (23.7)       | 65      | (24.7)       | 68      | (26.2)       |
| About equally satisfied and dissatisfied                                             | 83       | (20.2)       | 54     | (15.7)       | 50      | (17.0)       | 58      | (20.8)       | 50      | (19.0)       | 44      | (16.9)       |
| Moderately satisfied                                                                 | 73       | (17.8)       | 58     | (16.8)       | 45      | (15.3)       | 43      | (15.4)       | 51      | (19.4)       | 44      | (16.9)       |
| Very satisfied                                                                       | 150      | (36.5)       | 55     | (15.9)       | 49      | (16.7)       | 49      | (17.6)       | 43      | (16.4)       | 39      | (15.0)       |
| <b>IWQOL-Lite Sexual Score (median, 25<sup>th</sup>, 75<sup>th</sup> percentile)</b> | 62.5     | (31.3, 87.5) | 100.0  | (75.0-100.0) | 100.0   | (81.3-100.0) | 100.0   | (75.0-100.0) | 100.0   | (75.0-100.0) | 100.0   | (75.0-100.0) |

Abbreviations: IWQOL, Impact of Weight on Quality of Life.

**eTable 7. Modeled Parameters of Sexual Function Before and After Bariatric Surgery, by Sex**

|                                                                | Model-Based Estimates, %(95% CI) |                 |                 |                  |                  |                  | Adjusted P         |                    |                       |
|----------------------------------------------------------------|----------------------------------|-----------------|-----------------|------------------|------------------|------------------|--------------------|--------------------|-----------------------|
|                                                                | Baseline                         | 1 Year          | 2 Years         | 3 Years          | 4 Years          | 5 Years          | Baseline vs Year 1 | Baseline vs Year 5 | Linear Trend Year 1-5 |
| <b>Women</b>                                                   |                                  |                 |                 |                  |                  |                  |                    |                    |                       |
| <b>In the past month,</b>                                      |                                  |                 |                 |                  |                  |                  |                    |                    |                       |
| Felt sexual desire (N=1534)                                    |                                  |                 |                 |                  |                  |                  | <.001              | 0.06               | 0.01                  |
| Not at all                                                     | 28.0(27.7-28.2)                  | 20.4(20.1-20.8) | 21.3(21.0-21.7) | 25.3 (24.9-25.7) | 26.0 (25.6-26.4) | 28.7 (28.3-29.0) |                    |                    |                       |
| Once a month                                                   | 26.6(26.3-26.9)                  | 17.9(17.6-18.2) | 20.2(19.8-20.6) | 19.6 (19.2-20.0) | 20.4 (20.0-20.7) | 19.9 (19.5-20.3) |                    |                    |                       |
| Once a week                                                    | 22.0(21.7-22.3)                  | 24.6(24.2-24.9) | 24.1(23.7-24.5) | 23.1 (22.7-23.5) | 22.3 (21.9-22.7) | 25.2 (24.8-25.6) |                    |                    |                       |
| A few times a week                                             | 18.0(17.6-18.4)                  | 28.4(27.9-28.9) | 27.4(26.9-27.9) | 25.4 (24.8-25.9) | 24.9 (24.3-25.4) | 21.7 (21.1-22.2) |                    |                    |                       |
| At least once a day                                            | 5.5(5.0-5.9)                     | 8.7(8.1-9.3)    | 6.9(6.3-7.6)    | 6.6 (6.0-7.3)    | 6.5 (5.8-7.2)    | 4.5 (3.9-5.2)    |                    |                    |                       |
| Participated in sexual activity (N=1544)                       |                                  |                 |                 |                  |                  |                  | <.001              | 0.053              | 0.03                  |
| Not at all                                                     | 39.2(38.9-39.5)                  | 30.4(30.0-30.7) | 29.9(29.6-30.3) | 30.5 (30.1-30.8) | 33.7 (33.4-34.1) | 36.1 (35.7-36.4) |                    |                    |                       |
| Once a month                                                   | 25.8(25.5-26.2)                  | 18.2(17.8-18.5) | 21.5(21.1-21.9) | 21.4 (21.0-21.8) | 20.5 (20.2-20.9) | 23.2 (22.8-23.6) |                    |                    |                       |
| Once a week                                                    | 24.8(24.4-25.1)                  | 29.8(29.3-30.2) | 28.3(27.8-28.7) | 29.8 (29.3-30.3) | 28.3 (27.8-28.8) | 26.2 (25.8-26.7) |                    |                    |                       |
| A few times a week                                             | 7.8(7.3-8.3)                     | 17.4(16.8-18.0) | 16.8(16.1-17.5) | 15.5 (14.8-16.2) | 15.1 (14.3-15.8) | 12.6 (11.9-13.3) |                    |                    |                       |
| At least once a day                                            | 2.4(1.8-2.9)                     | 4.3(3.6-5.0)    | 3.5(2.8-4.2)    | 2.9 (2.1-3.7)    | 2.4 (1.5-3.2)    | 1.9 (1.3-2.5)    |                    |                    |                       |
| Reasons for no sexual activity (N=1544)                        |                                  |                 |                 |                  |                  |                  |                    |                    |                       |
| Too tired/ not interested                                      | 15.7 (13.8-17.5)                 | 8.7 (7.3-10.1)  | 10.3 (8.7-11.9) | 11.9 (10.2-13.6) | 13.0 (11.1-14.8) | 14.8 (12.8-16.8) | <.001              | 0.70               | <.001                 |
| Physical problems                                              | 6.2 (5.0-7.5)                    | 3.9 (2.9-4.8)   | 4.0 (3.0-5.1)   | 3.7 (2.7-4.8)    | 3.9 (2.8-4.9)    | 3.6 (2.6-4.7)    | 0.002              | 0.001              | 0.92                  |
| No partner or partner not physically present                   | 22.1(19.6-24.6)                  | 21.9(19.3-24.5) | 19.6(17.0-22.3) | 17.7 (15.2-20.2) | 18.0 (15.4-20.7) | 21.4 (18.6-24.2) | 0.99               | 0.93               | 0.81                  |
| Partner not interested                                         | 3.7(3.0-4.5)                     | 2.7(1.9-3.4)    | 2.4(2.0-3.4)    | 2.7 (2.0-3.4)    | 3.7 (2.8-4.6)    | 3.4 (2.5-4.3)    | 0.04               | 0.78               | 0.04                  |
| Physical health limited sex (N=1490)                           |                                  |                 |                 |                  |                  |                  | <.001              | <.001              | 0.06                  |
| Extremely                                                      | 10.3(10.0-10.7)                  | 2.6(2.3-2.9)    | 3.1(2.7-3.5)    | 3.4 (3.0-3.8)    | 4.6 (4.2-5.0)    | 3.2 (2.8-3.7)    |                    |                    |                       |
| Quite a bit                                                    | 10.6(10.3-10.9)                  | 2.4(2.1-2.6)    | 3.2(2.9-3.5)    | 3.1 (2.8-3.3)    | 2.5 (2.2-2.8)    | 4.5 (4.2-4.8)    |                    |                    |                       |
| Moderately                                                     | 14.4(14.0-14.7)                  | 3.8(3.5-4.1)    | 4.8(4.5-5.1)    | 4.7 (4.4-5.0)    | 4.5 (4.1-4.8)    | 5.5 (5.1-5.8)    |                    |                    |                       |
| Slightly                                                       | 22.0(21.7-22.3)                  | 11.4(11.1-11.7) | 11.6(11.3-11.9) | 12.4 (12.1-12.7) | 13.4 (13.1-13.8) | 12.2 (11.9-12.5) |                    |                    |                       |
| Not at all                                                     | 42.8(42.5-43.0)                  | 79.9(79.7-80.0) | 77.3(77.1-77.4) | 76.4 (76.3-76.6) | 75.0 (74.9-75.2) | 74.6 (74.5-74.8) |                    |                    |                       |
| Ways physical health limited sexual activity (N=1490)          |                                  |                 |                 |                  |                  |                  |                    |                    |                       |
| Fatigue or low energy or not interested                        | 42.8(40.3-45.4)                  | 15.0(13.2-16.8) | 17.8(15.8-19.9) | 19.2 (17.0-21.4) | 19.9 (17.7-22.2) | 21.0 (18.8-23.3) | <.001              | <.001              | <.001                 |
| Pain or fear of damaging health                                | 15.3(13.6-17.0)                  | 8.3(7.0-9.6)    | 8.5(7.1-9.9)    | 10.3 (8.7-11.8)  | 11.1 (9.4-12.8)  | 11.4 (9.8-13.0)  | <.001              | <.001              | <.001                 |
| Embarrassment or fear of hurting partner                       | 28.5(26.1-30.8)                  | 6.4(5.0-7.7)    | 6.3(5.0-7.7)    | 6.7 (5.3-8.2)    | 8.1 (6.5-9.7)    | 7.5 (5.9-9.1)    | <.001              | <.001              | 0.16                  |
| Difficulty becoming aroused, with lubrication or having orgasm | 28.7(26.5-31.0)                  | 11.0(9.5-12.5)  | 12.8(11.1-14.4) | 12.6 (10.8-14.3) | 14.4 (12.6-16.3) | 14.3 (12.5-16.2) | <.001              | <.001              | 0.001                 |

Table is continued on the next page.

**eTable7 Continued.** Modeled Parameters of Sexual Function Before and After Bariatric Surgery, by Sex

|                                              | Model-Based Estimates, %(95% CI) |                  |                  |                  |                  |                  | Adjusted P         |                    |                       |
|----------------------------------------------|----------------------------------|------------------|------------------|------------------|------------------|------------------|--------------------|--------------------|-----------------------|
|                                              | Baseline                         | 1 Year           | 2 Years          | 3 Years          | 4 Years          | 5 Years          | Baseline vs Year 1 | Baseline vs Year 5 | Linear Trend Year 1-5 |
| Satisfaction with sex life (N=1456)          |                                  |                  |                  |                  |                  |                  | <.001              | <.001              | 0.08                  |
| Very dissatisfied                            | 31.1(30.8-31.3)                  | 15.1(14.8-15.4)  | 15.5(15.2-15.8)  | 17.4 (17.1-17.7) | 19.9 (19.6-20.2) | 17.1 (16.8-17.4) |                    |                    |                       |
| Moderately dissatisfied                      | 19.6(19.3-19.9)                  | 11.9(11.6-12.2)  | 11.9(11.6-12.3)  | 13.0 (12.6-13.3) | 10.7 (10.4-11.0) | 14.3 (13.9-14.7) |                    |                    |                       |
| About equally satisfied and dissatisfied     | 20.3(20.0-20.6)                  | 17.4(17.1-17.8)  | 21.9(21.6-22.3)  | 19.5 (19.2-19.9) | 20.6 (20.2-21.0) | 20.4 (20.1-20.8) |                    |                    |                       |
| Moderately satisfied                         | 13.4(13.1-13.6)                  | 23.2(22.8-23.5)  | 18.9(18.5-19.3)  | 18.6 (18.2-19.0) | 17.7 (17.3-18.1) | 19.3 (18.9-19.7) |                    |                    |                       |
| Very satisfied                               | 15.7(15.4-15.9)                  | 32.4(32.1-32.7)  | 31.7(31.4-32.0)  | 31.5 (31.2-31.8) | 31.0 (30.7-31.4) | 28.8 (28.5-29.1) |                    |                    |                       |
| <b>IWQOL-Lite (N=1499)</b>                   |                                  |                  |                  |                  |                  |                  |                    |                    |                       |
| IWQOL-Lite Sexual Score, mean (95% CI)       | 50.3 (48.6-52.0)                 | 80.2 (78.6-81.7) | 81.5 (80.0-83.1) | 80.5 (78.9-82.1) | 78.1 (76.4-79.8) | 76.9 (75.1-78.7) | <.001              | <.001              | <.001                 |
| <b>Men</b>                                   |                                  |                  |                  |                  |                  |                  |                    |                    |                       |
| <b>In past month,</b>                        |                                  |                  |                  |                  |                  |                  |                    |                    |                       |
| Felt sexual desire (N=419)                   |                                  |                  |                  |                  |                  |                  | 0.02               | 0.63               | 0.33                  |
| Not at all                                   | 10.1(8.8-11.4)                   | 6.0(4.7-7.3)     | 4.9(2.9-6.9)     | 5.7 (3.8-7.5)    | 6.1 (4.2-8.0)    | 8.5 (6.7-10.4)   |                    |                    |                       |
| Once a month                                 | 8.7(7.6-9.8)                     | 3.8(2.7-5.0)     | 5.4(4.1-6.6)     | 4.6 (3.1-6.0)    | 4.1 (2.5-5.7)    | 8.7 (7.1-10.4)   |                    |                    |                       |
| Once a week                                  | 19.5(18.3-20.7)                  | 14.9(13.6-16.2)  | 16.4(15.0-17.8)  | 18.3 (16.7-19.8) | 19.3 (17.6-20.9) | 18.2 (16.7-19.7) |                    |                    |                       |
| A few times a week                           | 38.8(37.7-39.9)                  | 46.4(45.3-47.6)  | 46.8(45.5-48.1)  | 44.5 (43.1-45.8) | 42.0 (40.6-43.5) | 37.5 (36.0-38.9) |                    |                    |                       |
| At least once a day                          | 22.9(21.8-23.9)                  | 28.8(27.5-30.0)  | 26.5(25.2-27.8)  | 27.1 (25.7-28.4) | 28.5 (27.1-29.9) | 27.0 (25.7-28.4) |                    |                    |                       |
| Participated in sexual activity (N=418)      |                                  |                  |                  |                  |                  |                  | 0.02               | 0.08               | 0.97                  |
| Not at all                                   | 27.3(26.2-28.4)                  | 14.6 (13.3-15.9) | 16.0(14.5-17.6)  | 17.0 (15.4-18.7) | 15.3 (13.6-17.0) | 15.4 (13.8-17.0) |                    |                    |                       |
| Once a month                                 | 14.5(13.3-15.7)                  | 9.6 (8.4-10.8)   | 12.3(10.9-13.7)  | 10.5 (9.1-11.9)  | 10.9 (9.4-12.5)  | 15.0 (13.4-16.6) |                    |                    |                       |
| Once a week                                  | 27.0(25.8-28.3)                  | 30.3 (28.9-31.7) | 22.4(20.9-23.8)  | 25.1 (23.5-26.7) | 27.3 (25.6-29.0) | 24.3 (22.6-25.9) |                    |                    |                       |
| A few times a week                           | 24.3(22.8-25.9)                  | 33.8 (32.2-35.5) | 38.4(36.6-40.1)  | 38.8 (37.0-40.6) | 35.1 (33.1-37.0) | 35.1 (33.1-37.0) |                    |                    |                       |
| At least once a day                          | 6.8(5.3-8.2)                     | 11.7 (10.0-13.4) | 10.9(9.2-12.7)   | 8.6 (6.4-10.7)   | 11.4 (9.6-13.2)  | 10.3 (7.9-12.6)  |                    |                    |                       |
| Reasons for no sexual activity (N=418)       |                                  |                  |                  |                  |                  |                  |                    |                    |                       |
| Too tired or not interested                  | 8.1(4.9-11.2)                    | 3.0 (1.0-4.9)    | 2.6(0.6-4.7)     | 2.7 (0.6-4.8)    | 4.6 (1.6-7.5)    | 5.2 (2.4-7.9)    | 0.003              | 0.27               | 0.15                  |
| Physical problems                            | 11.5(6.3-16.7)                   | 3.1 (1.0-5.2)    | 3.8(1.5-6.1)     | 5.8 (2.7-8.9)    | 5.8 (2.7-9.0)    | 5.7 (2.7-8.6)    | <.001              | 0.005              | 0.06                  |
| No partner or partner not physically present | 14.5(8.4-20.7)                   | 10.3 (5.1-15.5)  | 9.0(3.8-14.2)    | 8.7 (3.6-13.7)   | 8.9 (3.1-14.8)   | 11.6 (5.3-17.9)  | 0.30               | 0.71               | 0.97                  |
| Partner not interested                       | 3.2(1.6-4.9)                     | 1.7 (0.7-2.7)    | 1.6(0.5-2.6)     | 1.4 (0.4-2.5)    | 1.7 (0.6-2.7)    | 2.0 (0.7-3.2)    | 0.04               | 0.19               | 0.93                  |
| Physical health limited sex (N=406)          |                                  |                  |                  |                  |                  |                  | <.001              | <.001              | 0.22                  |
| Extremely                                    | 12.5(11.3-13.7)                  | 3.2(1.9-4.6)     | 4.9(3.4-6.5)     | 4.3 (2.7-6.0)    | 3.9 (2.1-5.6)    | 6.0 (4.3-7.6)    |                    |                    |                       |
| Quite a bit                                  | 12.8(11.4-14.2)                  | 2.2(1.0-3.4)     | 2.4(1.5-3.4)     | 4.5 (2.6-6.5)    | 4.9 (3.3-6.5)    | 4.5 (2.9-6.1)    |                    |                    |                       |
| Moderately                                   | 16.8(15.6-18.0)                  | 7.0(6.0-8.0)     | 4.7(3.7-5.8)     | 6.0 (4.8-7.2)    | 8.4 (7.2-9.7)    | 7.4 (6.2-8.6)    |                    |                    |                       |
| Slightly                                     | 21.8(20.7-22.9)                  | 12.2(11.2-13.2)  | 10.7(9.6-11.8)   | 11.9 (10.7-13.1) | 11.3 (10.1-12.5) | 10.8 (9.6-12.0)  |                    |                    |                       |
| Not at all                                   | 36.1(35.3-37.0)                  | 75.5(74.9-76.0)  | 77.2(76.6-77.7)  | 73.2 (72.6-73.9) | 71.5 (70.8-72.2) | 71.3 (70.6-72.0) |                    |                    |                       |

Table is continued on the next page.

**eTable 7 Continued.** Modeled Parameters of Sexual Function Before and After Bariatric Surgery, by Sex

|                                                                     | Model-Based Estimates, %(95% CI) |                  |                  |                  |                  |                  | Adjusted <i>P</i>  |                    |                       |
|---------------------------------------------------------------------|----------------------------------|------------------|------------------|------------------|------------------|------------------|--------------------|--------------------|-----------------------|
|                                                                     | Baseline                         | 1 Year           | 2 Years          | 3 Years          | 4 Years          | 5 Years          | Baseline vs Year 1 | Baseline vs Year 5 | Linear Trend Year 1-5 |
| Ways physical health limited sexual activity (N=407)                |                                  |                  |                  |                  |                  |                  |                    |                    |                       |
| Fatigue or not interested                                           | 46.5(38.9-54.2)                  | 16.4 (12.2-20.7) | 13.2(9.1-17.4)   | 17.9 (12.8-23.1) | 20.3 (14.8-25.8) | 21.3 (15.8-26.9) | <.001              | <.001              | 0.02                  |
| Pain or fear of damaging health                                     | 12.5(8.5-16.4)                   | 6.8 (4.1-9.5)    | 5.1(2.8-7.5)     | 6.8 (3.9-9.6)    | 8.1 (4.8-11.3)   | 9.0 (5.5-12.6)   | 0.001              | 0.20               | 0.07                  |
| Embarrassment or fear of hurting partner                            | 32.4(25.2-39.6)                  | 8.2 (5.1-11.4)   | 6.3(3.3-9.4)     | 8.9 (5.1-12.8)   | 8.9 (5.0-12.9)   | 9.7 (5.8-13.7)   | <.001              | <.001              | 0.50                  |
| Difficulty becoming aroused, having orgasm or functional difficulty | 49.5(41.2-57.7)                  | 22.9 (17.7-28.1) | 20.4(15.2-25.6)  | 23.2 (17.4-29.0) | 26.9 (20.3-33.4) | 23.5 (17.6-29.5) | <.001              | <.001              | 0.54                  |
| Satisfaction with sex life (N=409)                                  |                                  |                  |                  |                  |                  |                  | <.001              | <.001              | 0.85                  |
| Very dissatisfied                                                   | 40.1(39.2-41.0)                  | 16.5(15.4-17.7)  | 17.5(16.3-18.7)  | 18.4 (17.1-19.7) | 17.6 (16.2-18.9) | 16.2 (14.9-17.6) |                    |                    |                       |
| Moderately dissatisfied                                             | 17.1(16.0-18.1)                  | 15.6(14.3-16.8)  | 13.8(12.5-15.2)  | 13.4 (12.0-14.7) | 17.7 (16.2-19.1) | 14.9 (13.5-16.4) |                    |                    |                       |
| About equally satisfied and dissatisfied                            | 20.1(18.9-21.3)                  | 15.3(14.2-16.5)  | 17.2(15.9-18.5)  | 21.3 (20.0-22.7) | 19.0 (17.6-20.5) | 17.1 (15.6-18.6) |                    |                    |                       |
| Moderately satisfied                                                | 13.7(12.6-14.9)                  | 20.9(19.7-22.2)  | 22.9(21.4-24.3)  | 22.5 (21.0-24.1) | 23.0 (21.4-24.6) | 23.6 (22.0-25.1) |                    |                    |                       |
| Very satisfied                                                      | 9.0(8.1-10.0)                    | 31.6(30.5-32.7)  | 28.7(27.5-29.9)  | 24.4 (23.1-25.6) | 22.8 (21.4-24.1) | 28.2 (26.8-29.5) |                    |                    |                       |
| <b>IWQOL-Lite</b> (N=417)                                           |                                  |                  |                  |                  |                  |                  |                    |                    |                       |
| IWQOL-Lite Sexual Score, mean (95% CI)                              | 53.4 (49.8-57.0)                 | 80.1 (77.0-83.1) | 81.1 (78.0-84.3) | 78.4 (75.1-81.7) | 79.5 (76.3-82.8) | 76.1 (72.6-79.6) | <.001              | <.001              | <.001                 |

Abbreviations: IWQOL, Impact of Weight on Quality of Life.

<sup>a</sup>Adjusted for age, site, smoking status, and marital status.

<sup>b</sup>*P* values were adjusted using simulation.

**eTable 8.** Observed Proportion of Patients with Clinically Important Improvements in Parameters of Sexual Function Following Bariatric Surgery, by Sex.

|                                        | No./total No. (%) |                |                |                |                |
|----------------------------------------|-------------------|----------------|----------------|----------------|----------------|
|                                        | 1 Year            | 2 Years        | 3 Years        | 4 Years        | 5 Years        |
| <b>Women</b>                           |                   |                |                |                |                |
| Frequency of sexual desire             | 425/900 (47.2)    | 377/801 (47.1) | 344/785 (43.8) | 314/739 (42.5) | 321/767 (41.9) |
| Frequency of sexual activity           | 419/1043 (40.2)   | 382/930 (41.1) | 351/886 (39.6) | 320/867 (36.9) | 322/881 (36.6) |
| Physical health limits sexual activity | 547/724 (75.6)    | 455/645 (70.5) | 443/616 (71.9) | 435/606 (71.8) | 417/610 (68.4) |
| Satisfaction with sexual life          | 475/820 (57.9)    | 394/729 (54.1) | 370/692 (53.5) | 374/689 (54.3) | 366/679 (53.9) |
| <b>Men</b>                             |                   |                |                |                |                |
| Frequency of sexual desire             | 89/141 (63.1)     | 80/126 (63.5)  | 70/113 (61.9)  | 66/101 (65.4)  | 67/107 (62.6)  |
| Frequency of sexual activity           | 118/226 (52.2)    | 104/197 (52.8) | 90/181 (49.7)  | 88/169 (52.1)  | 97/173 (56.1)  |
| Physical health limits sexual activity | 166/226 (73.5)    | 150/197 (76.1) | 135/181 (74.6) | 122/172 (70.9) | 119/177 (67.2) |
| Satisfaction with sexual life          | 137/256 (53.5)    | 125/223 (56.1) | 117/212 (55.2) | 100/203 (49.3) | 114/204 (55.9) |

**eTable 9.** Associations between Baseline Characteristics and Surgical Procedure with Clinically Meaningful Presurgery-to-Postsurgery Improvements in Parameters of Sexual Function in Years 1-5 Following Bariatric Surgery in Women.<sup>a</sup>

|                                                                     | Improvement in frequency of sexual desire (n=884) |        | Improvement in frequency of sexual activity (n=1152) |        | Improvement in degree physical health limits sexual activity (n=830) |        | Improvement in satisfaction with sexual life (n=907) |       |
|---------------------------------------------------------------------|---------------------------------------------------|--------|------------------------------------------------------|--------|----------------------------------------------------------------------|--------|------------------------------------------------------|-------|
|                                                                     | ARR(95%CI)                                        | P      | ARR(95%CI)                                           | P      | ARR(95%CI)                                                           | P      | ARR(95%CI)                                           | P     |
| Age, per 10 years younger                                           | 1.30(1.19-1.41)                                   | <.0001 | 1.27 (1.18-2.37)                                     | <.0001 | 0.98 (0.94-1.02)                                                     | 0.29   | 1.02(0.96-1.09)                                      | 0.48  |
| Nonwhite race (vs white)                                            | 1.08(0.89-1.32)                                   | 0.43   | 1.06 (0.90-1.25)                                     | 0.51   | 0.98 (0.89-1.09)                                                     | 0.75   | 0.98(0.84-1.14)                                      | 0.76  |
| Hispanic ethnicity (vs non-Hispanic)                                | 0.98(0.67-1.42)                                   | 0.91   | 1.10 (0.87-1.41)                                     | 0.43   | 1.10 (0.95-1.28)                                                     | 0.21   | 1.27(0.99-1.62)                                      | 0.06  |
| Fewer depressive symptoms, per 5 BDI points                         | 1.05(0.999-1.10)                                  | 0.052  | 1.04 (0.997-1.09)                                    | 0.07   | 1.05 (1.02-1.08)                                                     | <0.001 | 1.07(1.03-1.11)                                      | 0.001 |
| Higher BMI, per 5 BMI points                                        | 1.03(0.98-1.08)                                   | 0.22   | 0.99 (0.95-1.29)                                     | 0.56   | 0.99 (0.97-1.02)                                                     | 0.56   | 1.02(0.98-1.05)                                      | 0.34  |
| Current or recent smoker (vs not)                                   | 1.01(0.84-1.21)                                   | 0.94   | 1.11 (0.96-1.29)                                     | 0.18   | 0.95 (0.85-1.07)                                                     | 0.40   | 1.08(0.95-1.23)                                      | 0.26  |
| Married/living as married (vs not)                                  | 1.09(0.96-1.25)                                   | 0.19   | 1.33 (1.17-1.50)                                     | <.0001 | 0.86 (0.80-0.92)                                                     | <.0001 | 1.03(0.91-1.15)                                      | 0.55  |
| Menopausal (vs not)                                                 | 1.03(0.83-1.29)                                   | 0.76   | 0.89 (0.73-1.08)                                     | 0.25   | 0.97 (0.88-1.08)                                                     | 0.62   | 1.04(0.89-1.22)                                      | 0.61  |
| Urinary incontinence (vs none)                                      |                                                   |        |                                                      |        |                                                                      |        | 0.87(0.79-0.96)                                      | <0.01 |
| Sleep apnea (vs none)                                               | 0.84(0.72-0.97)                                   | 0.02   |                                                      |        |                                                                      |        |                                                      | 0.01  |
| Dyslipidemia (vs none)                                              | 0.87(0.76-0.98)                                   | 0.03   |                                                      |        |                                                                      |        |                                                      |       |
| Cardiovascular disease history (vs none)                            |                                                   |        | 0.69 (0.51-0.94)                                     | 0.02   | 0.77 (0.63-0.93)                                                     | 0.01   |                                                      |       |
| Medication that may improve sexual function (vs none)               | 0.86(0.66-1.12)                                   | 0.27   | 0.93 (0.74-1.16)                                     | 0.52   | 1.04 (0.9-1.17)                                                      | 0.56   | 0.99(0.85-1.16)                                      | 0.90  |
| Antidepressant medication that may impair sexual function (vs none) | 0.92(0.81-1.06)                                   | 0.24   | 0.84 (0.75-0.95)                                     | 0.01   | 0.94 (0.88-1.01)                                                     | 0.11   | 0.92(0.83-1.02)                                      | 0.11  |
| Surgical procedure (vs LAGB)                                        |                                                   | 0.74   |                                                      | 0.66   |                                                                      | 0.28   |                                                      | 0.84  |
| RYGB                                                                | 1.01(0.87-1.18)                                   |        | 1.06 (0.92-1.21)                                     |        | 1.06 (0.97-1.16)                                                     |        | 1.03(0.92-1.15)                                      |       |
| Other                                                               | 0.90(0.66-1.23)                                   |        | 0.99 (0.76-1.28)                                     |        | 1.13 (0.94-1.36)                                                     |        | 0.98(0.74-1.29)                                      |       |

Abbreviations: ARR, adjusted relative risk; BDI, Beck Depression Inventory; BMI, body mass index; LAGB, laparoscopic adjustable gastric banding; RYGB, Roux-en-Y gastric bypass.

<sup>a</sup>The following variables were forced into each model: site, baseline age, smoking status, marital status, race, ethnicity, BMI, menopausal status, BDI score, medications that may impair sexual functioning, medications that may improve sexual functioning, and the baseline value of the corresponding outcome. The following variables were considered and retained if statistically significant: baseline education, baseline sleep apnea, regular alcohol use, alcohol use disorder symptoms, prior live or still birth, cardiovascular disease history, hypertension, diabetes with insulin, dyslipidemia, urinary incontinence, and hormonal medications that may influence sexual functioning.

**eTable 10.** Associations between Baseline Characteristics and Surgical Procedure with Clinically Meaningful Presurgery-to-Postsurgery Improvements in Parameters of Sexual Function in Years 1-5 Following Bariatric Surgery in Men.<sup>a</sup>

|                                                                       | Improvement in frequency of sexual desire (n=149) |       | Improvement in frequency of sexual activity (n=242) |      | Improvement in degree physical health limits sexual activity (n=240) |       | Improvement in satisfaction with sexual life (n=267) |       |
|-----------------------------------------------------------------------|---------------------------------------------------|-------|-----------------------------------------------------|------|----------------------------------------------------------------------|-------|------------------------------------------------------|-------|
|                                                                       | ARR(95%CI)                                        | P     | ARR(95%CI)                                          | P    | ARR(95%CI)                                                           | P     | ARR(95%CI)                                           | P     |
| Age, per 10 years younger                                             | 1.19(1.08-1.32)                                   | 0.001 | 1.12 (1.005-1.24)                                   | 0.04 | 1.02 (0.95-1.10)                                                     | 0.54  | 1.02(0.93-1.13)                                      | 0.62  |
| Nonwhite race (vs white)                                              | 1.21(0.88-1.64)                                   | 0.24  | 1.01 (0.64-1.61)                                    | 0.95 | 0.99 (0.78-1.25)                                                     | 0.93  | 1.41(1.09-1.82)                                      | 0.01  |
| Hispanic ethnicity (vs non-Hispanic)                                  | 0.75 (0.21-2.62)                                  | 0.65  | 1.51 (0.72-3.16)                                    | 0.28 | 0.98 (0.71-1.35)                                                     | 0.92  | 1.37(0.97-1.94)                                      | 0.07  |
| Education (vs high school or less)                                    |                                                   |       |                                                     |      |                                                                      |       |                                                      |       |
| Some college                                                          |                                                   |       |                                                     |      |                                                                      |       | 1.42(1.09-1.85)                                      |       |
| College degree or higher                                              |                                                   |       |                                                     |      |                                                                      |       | 1.29(0.98-1.69)                                      |       |
| Fewer depressive symptoms, per 5 BDI points                           | 0.95(0.89-1.02)                                   | 0.18  | 1.03 (0.95-1.13)                                    | 0.46 | 1.06 (1.002-1.12)                                                    | 0.04  | 1.04(0.96-1.13)                                      | 0.31  |
| Higher BMI, per 5 BMI points                                          | 0.99(0.91-1.06)                                   | 0.70  | 1.00 (0.92-1.08)                                    | 0.92 | 1.01 (0.97-1.05)                                                     | 0.74  | 1.08(1.03-1.14)                                      | <0.01 |
| Current or recent smoker (vs not)                                     | 1.19(0.86-1.63)                                   | 0.29  | 1.21 (0.84-1.73)                                    | 0.31 | 1.04 (0.83-1.32)                                                     | 0.72  | 0.97(0.72-1.32)                                      | 0.86  |
| Married/living as married (vs not)                                    | 1.26(0.98-1.63)                                   | 0.08  | 0.91 (0.72-1.16)                                    | 0.45 | 0.94 (0.82-1.08)                                                     | 0.41  | 1.24(1.002-1.52)                                     | 0.048 |
| Regular alcohol use (vs none)                                         |                                                   |       |                                                     |      | 1.27 (1.09-1.47)                                                     | <0.01 |                                                      |       |
| Sleep apnea (vs none)                                                 |                                                   |       |                                                     |      |                                                                      |       | 0.78(0.64-0.93)                                      | 0.01  |
| Cardiovascular disease history (vs none)                              | 0.95(0.71-1.27)                                   | 0.72  | 0.95 (0.70-1.29)                                    | 0.75 | 0.92 (0.75-1.12)                                                     | 0.40  | 0.76(0.58-0.99)                                      | 0.04  |
| Medication that may improve sexual function (vs none)                 | 1.09(0.74-1.62)                                   | 0.65  | 0.75 (0.49-1.14)                                    | 0.18 | 1.06 (0.82-1.38)                                                     | 0.65  | 1.28(0.83-1.98)                                      | 0.27  |
| Antidepressant medication that may impair sexual function (vs none)   | 0.94(0.73-1.22)                                   | 0.64  | 0.89 (0.69-1.15)                                    | 0.39 | 1.00 (0.87-1.15)                                                     | 0.31  | 0.89(0.70-1.13)                                      | 0.34  |
| Antihypertensive medication that may impair sexual function (vs none) | 1.00(0.79-1.27)                                   | 0.98  | 1.13 (0.90-1.41)                                    | 0.28 | 0.92 (0.79-1.08)                                                     | 0.99  | 1.20(0.98-1.47)                                      | 0.07  |
| Surgical procedure (vs LAGB)                                          |                                                   | 0.52  |                                                     | 0.43 |                                                                      | 0.22  |                                                      | 0.21  |
| RYGB                                                                  | 1.20(0.87-1.64)                                   |       | 1.13 (0.87-1.47)                                    |      | 1.17 (0.98-1.39)                                                     |       | 1.00(0.80-1.25)                                      |       |
| Other                                                                 | 1.25(0.72-2.15)                                   |       | 1.40 (0.83-2.39)                                    |      | 1.27 (0.80-1.64)                                                     |       | 0.74(0.51-1.07)                                      |       |

Abbreviations: ARR, adjusted relative risk; BDI, Beck Depression Inventory; BMI, body mass index; LAGB, laparoscopic adjustable gastric banding; RYGB, Roux-en-Y gastric bypass.

<sup>a</sup>The following variables were forced into each model: site, baseline age, smoking status, marital status, race, ethnicity, BMI, BDI score, cardiovascular disease history, medications that may impair sexual functioning, medications that may improve sexual functioning, and the baseline value of the corresponding outcome. The following variables were considered and retained if statistical significant: baseline education, baseline sleep apnea, regular alcohol use, alcohol use disorder symptoms, hypertension, diabetes with insulin, dyslipidemia, and urinary incontinence
